1 **Antibiotic resistance genes and class 1 integron: Evidence of fecal pollution**  
2 **as a major driver for their abundance in water and sediments impacted by**  
3 **metal contamination and wastewater in the Andean region of Bolivia.**

4  
5 Jorge Agramont<sup>1\*</sup>, Sergio Gutierrez-Cortez<sup>1\*</sup>, Enrique Joffré<sup>2,3</sup>, Åsa Sjöling<sup>2,3</sup>,  
6 Carla Calderon Toledo<sup>1</sup>

7 <sup>1</sup> Environmental Microbiology Unit. Institute of Molecular Biology and  
8 Biotechnology, Universidad Mayor de San Andrés, La Paz, Bolivia

9 <sup>2</sup> Department of Microbiology, Tumor and Cell Biology, Karolinska Institutet,  
10 Stockholm, Sweden

11 <sup>3</sup> Centre for Translational Microbiome Research, Karolinska Institutet, Stockholm,  
12 Sweden

13

14 \*Corresponding author

15 E-mail: sergio5515@yahoo.es (SG-C)

16 E-mail: jorge.agramont.s@outlook.com (JA)

17

18

19

20

21

22

23

24

## 25 **Abstract**

26 Water and sediment samples affected by mining activities were collected from  
27 three lakes in Bolivia, the pristine Andean lake Pata Khota, the Milluni Chico lake  
28 directly impacted by acid mine drainage, and the Uru-Uru lake located close to  
29 Oruro city and highly polluted by mining activities and human wastewater  
30 discharges. Physicochemical parameters, including metal compositions, were  
31 analyzed in water and sediment samples. Antibiotic resistance genes (ARGs),  
32 were screened for, and verified by quantitative PCR together with the mobile  
33 element class 1 integron (*int1*) as well as crAssphage, a marker of human fecal  
34 pollution. The gene *int1* showed a positive correlation with *sul1*, *sul2*, *tetA* and  
35 *blaOXA-2*. CrAssphage was only detected in Uru-Uru lake and its tributaries and  
36 significantly higher abundance of ARGs were found in these sites. Multivariate  
37 analysis showed that crAssphage abundance, electrical conductivity and pH were  
38 positively correlated with higher levels of *int1* and ARGs. Taken together our  
39 results suggest that fecal pollution is the major driver of higher ARGs and *int1* in  
40 wastewater and mining contaminated environments.

## 41 **Introduction**

42 Antibiotic resistance is considered a major threat to human health worldwide  
43 (1). Antibiotic resistance genes (ARGs) have been classified as emergent  
44 contaminants, with a significant impact in aquatic environments due to the  
45 possibility to be acquired by pathogens, which could lead to public health issues  
46 (2). Novel rearrangements of ARGs and mobile genetic elements (MGEs), that  
47 favor their dissemination, are considered xenogenetic pollutants. These elements

48 can be incorporated and replicated in environmental microorganisms, thereby  
49 increasing their concentration (3).

50 It has been reported that anthropogenic activities cause pollution of aquatic  
51 environments with ARGs and MGEs (4). Wastewater discharges cause co-  
52 occurrence of MGEs and different ARGs in water and sediments (5). At a  
53 continental scale, ARGs in sediments are strongly correlated with MGEs and  
54 antibiotic residues (6). Recently, it has been observed that microorganisms living in  
55 aquatic microbial communities that came from wastewater were able to transfer  
56 ARGs via horizontal gene transfer (HGT) after exposure to low levels of antibiotics  
57 and biocides (7). Many of the ARGs that can be found in clinical settings have also  
58 been found in the environment, suggesting the possibility of movement and  
59 dissemination between these two scenarios (8).

60 Mining activities cause contamination of downstream water with dissolved  
61 metals (9) where heavy metals tend to accumulate in sediments (10). It has been  
62 suggested that heavy metals can favor selection of ARGs via co-selection, *i.e.* the  
63 simultaneous acquisition of both, ARG and metal resistance genes, where the  
64 presence of metals constitutes the selective pressure (11). Several studies support  
65 this relation. Urban soil samples of Belfast in Northern Ireland, exhibited a pattern  
66 of co-occurrence between metals (Zn, Cu, Cd, Co, Ni, Hg, Cr and As) and many  
67 ARGs. Moreover, the degree of metal toxicity was positively correlated with the  
68 abundance of MGEs, and ARGs (12). Metals, as Cu and Zn can in some cases  
69 exert stronger selection pressure over soil microbial communities for the selection  
70 of resistant bacteria, even more than specific antibiotics (13). In the Dongying river  
71 in China, the levels of Cu and Cr were positively correlated with the abundance of

72 different ARGs (14), whereas both Zn and Pb levels were correlated with the  
73 abundance of erythromycin resistance genes in wastewater treatment plants (15).  
74 These data suggest that, aquatic environments are important for the ecology and  
75 evolution of ARGs. In particular, water bodies can be hotspots for the evolution of  
76 ARGs due to the convergence of antibiotics, microorganisms from different  
77 sources, biocides and heavy metals (16), generating a scenario that favors the  
78 emergence, persistence and dissemination of ARGs (17).

79 Levels of fecal pollution are not frequently considered in the analysis of  
80 selection and dissemination of ARGs (18). The incorporation of a molecular marker  
81 of human fecal pollution can help us to disentangle the accumulation of ARGs due  
82 to fecal bacterial discharges, and the ARGs selection and dissemination caused by  
83 other environmental contaminants (18). CrAssphage, most probably infect  
84 *Bacteroides* and *Prevotella* bacteria in the human gut (19). The gene KP06\_gp31  
85 that belongs to CrAssphage is highly abundant in aquatic environments  
86 contaminated by human feces, while it is less abundant in aquatic environments  
87 polluted by feces of other animals (20); thus, the CrAssphage can be considered a  
88 marker for human fecal pollution.

89 Mining activities, which are known to have a great impact on water resources  
90 (21, 22), have a long history in the Bolivian Andean region. This region that,  
91 includes La Paz, El Alto and Oruro cities, is going through a water scarcity process  
92 (23) as a consequence of climate change effect on glaciers (23). Furthermore,  
93 urban wastewater is directly released into the environment, polluting water with  
94 enteric pathogens and resistant bacteria (24, 25). To our knowledge, there are no  
95 previous studies in the region that consider the problem of accumulation of

96 emergent contaminants such as ARGs, MGEs in water and sediments, of mining  
97 impacted sites and water reservoirs, taking into consideration the effects of  
98 wastewater discharges through the use of a human fecal pollution molecular  
99 marker.

100 The aim of this work was to analyze the influence of metal pollution, and  
101 human fecal discharges on the abundance of different ARGs and the class 1  
102 Integron (*intl1*), in water and sediments samples from a pristine, metal polluted and  
103 wastewater-mining contaminated lakes, in order to explore the contributions of  
104 metals and fecal discharges in the abundance of ARGs. Our results showed an  
105 increased abundance of class 1 integron and ARGs in correlation with the levels of  
106 fecal pollution. Fecal polluted sites presented significantly higher levels of *intl1* and  
107 ARGs. Moreover, multivariate analysis showed that AGRs and *intl1* abundances  
108 were positively related with the abundance of crAssphage, and physicochemical  
109 parameters (pH and EC), suggesting that fecal bacterial contributions are the main  
110 responsible for the increased abundance of ARGs into the environment.

## 111 **Materials and methods**

### 112 **Sampling sites**

#### 113 **The Milluni valley Lakes**

114 Milluni valley is located in the Andean region of Bolivia, in the Department of La  
115 Paz, 20 Km from La Paz city in the Cordillera Real. It is a glacial valley at the foot  
116 of the Huayna Potosi mountain. The valley has four lakes: Pata Khota (4670 masl),  
117 Jankho Khota (4575 masl), Milluni Chico (4540 masl), and Milluni Grande (4530  
118 masl) the biggest one, with a surface of 2.37 Km<sup>2</sup> and 4 m depth. Milluni Grande

119 has a dam that captures water that supplies water to the Puchucollo drinking water  
120 treatment plant, then water is distributed to the cities of La Paz and El Alto.

121 Mining activities were performed in the valley until 1990 by the company  
122 COMSUR, water from the surrounding lakes was used in the mining activities. Acid  
123 mining drainage (AMD) were discharged directly in the Milluni Chico lake, also  
124 contaminating the downstream lake of Milluni Grande. As a consequence, these  
125 two lakes acquired an extremely acid pH that favored the mobility of metals (Cd,  
126 Zn, As, Cu, Ni, Pb, Sn) in water and sediments (26). In contrast, the first lake Pata  
127 Khota, is fed by water proceeding from the melting of Huayna Potosi mountain.  
128 Anthropogenic activities are very limited around this site, and the lake is  
129 considered an ecologically intact environment (26, 27).

### 130 **Uru Uru Lake**

131 The Uru Uru Lake (3686 masl), situated in the department of Oruro, in the  
132 central part of the Altiplano in Bolivia, is an artificial shallow lake 8 Km south of  
133 Oruro city. The lake is characterized by an alkaline pH ( $8,3 \pm 0,6$ ) with a strong  
134 buffering capacity (28). The Tagarete channel receives and drains the wastewater  
135 from Oruro city towards the northern part of the lake. The north-east part of Uru  
136 Uru lake receives water discharges from San Jose Mine and the Vinto smelting  
137 plant (28). On the other hand, the Desaguadero River that comes from the Titicaca  
138 Lake drain the discharges of Kori Kollo and Kori Chaca meromictic lakes (once  
139 open pit gold mines) into the north-west part of Uru Uru (29). Previous studies in  
140 Uru Uru, reported that the contribution of both, wastewater and mining residues

141 increase the electrical conductivity (EC) and the concentration of certain metals  
142 and metalloids such as: Hg, Fe, Mn, W, and Sb. (28)

## 143 **Sample collection and processing**

144 Milluni samples were collected during the dry season in July 2016. Three  
145 points were randomly selected in Milluni Chico (MC) and Pata Khota (PK) lakes  
146 (Fig 1). Temperature, electrical conductivity (EC) and pH were measured directly  
147 on water (Oakton Instruments, Vernon Hills). Duplicate superficial sediment  
148 samples were collected in sterile 50 mL centrifuge tubes, for both DNA extraction  
149 and metal quantification. Samples were immediately labeled and stored at 4°C with  
150 cold packs and rapidly transported to the laboratory where they were stored at -  
151 70°C until their analysis.

152 Samples of Uru Uru and its tributaries were collected at the beginning of the  
153 rainy season (November 2018). Three different points were considered: **(1)** UP1:  
154 the channel that discharges the water of the meromictic lake Kori Chaca into the  
155 northwest part of Uru Uru lake. Agricultural activities are performed around this  
156 channel, and wastewater discharges were previously reported (30); **(2)** UP2: the  
157 Tagarete channel that carries untreated wastewater discharges from Oruro city;  
158 and **(3)** UP3: located in the north east part of the lake, where Tagarete's  
159 discharges drain.

160 Sediment samples were collected in triplicate. Parameters were recorded as  
161 described for Milluni. Surface sediment samples were collected in sterile 50 mL  
162 centrifuge tubes, using a Core Sampling Device. The samples were divided into  
163 two fractions, one for DNA extraction and the other for metal quantification.

164 Samples were kept at 4°C with cold packs, and transported to the laboratory in La  
165 Paz city, where they were rapidly stored at -70°C until their analysis. Surface water  
166 samples from UP1, UP2 and UP3 were collected in triplicate, filtered (300 mL)  
167 through 45 µm nitrocellulose filter membranes (Sigma-Aldrich), and the filters were  
168 immediately stored at -70°C until their analysis.

## 169 **Quantification of metals**

170 Six elements were quantified in the sediment and acidified water samples: Cu,  
171 Zn, Pb, Ni, Cd, and As. All the analyses were performed as previously described  
172 (30). The measurement was performed using Inductively coupled plasma mass  
173 spectrometry. The quantification was performed at the *Laboratorio de Calidad*  
174 *Ambiental* (LCA), Universidad Mayor de San Andres.

## 175 **DNA extraction**

176 DNA was extracted from sediments using PowerSoil DNA isolation kit (Qiagen,  
177 Germany). A prewashing step was performed using solution S0 (0.1 M EDTA, 0.1  
178 M Tris (pH 8.0), 1.5 M NaCl, 0.1 M NaH<sub>2</sub>PO<sub>4</sub>, and Na<sub>2</sub>HPO<sub>4</sub>) (31), due to the  
179 acidity of some samples and the presence of heavy metals. Briefly, 300 mg of  
180 sediments were washed with 1,5 mL of solution S0 overnight, in a horizontal  
181 shaker at 180 rpm at 4°C, the sediment was recovered by centrifugation at 12 000  
182 x g for 5 min and repeatedly washed with S0 until the supernatant end up clear.  
183 After washing, the sediments were transferred to PowerBead Tubes (Qiagen,  
184 Germany) and the extraction proceeded as described by the manufacturer's  
185 instructions.



186           Additionally, a quarter of the filtered water samples was used for DNA  
187 extraction using the PowerSoil DNA isolation kit (Qiagen, Germany). The filter was  
188 transferred into the *PowerBead* Tubes (Qiagen, Germany) to proceed with the  
189 DNA extraction according to the manufacturer's protocol. DNA concentration was  
190 measured using Qubit® dsDNA HS (Invitrogen, Oregon USA).

## 191 **Quantitative PCR**

192           Selection of ARGs for the analysis was performed as follows: The Antibiotic  
193 Resistance Genes Microbial DNA qPCR arrays (Qiagen, USA) were used to  
194 screen for the presence of ARGs. The array consists of 96 well plates with  
195 predisposed primers for 85 different ARGs (S1 Table) conferring resistance to  
196 antibiotics commonly used in clinical settings. Twelve positive ARGs (CT < 39)  
197 were selected to perform the assays of absolute quantification. Additionally,  
198 sulfonamides resistance genes (*Sul1* and *Sul2*) were included in the analysis as  
199 previous reports point at their presence in Milluni (32).

200           Standard curves for the absolute quantification of target genes were  
201 constructed using a plasmid as a template (S1 Fig). This plasmid was engineered  
202 by the insertion of the PCR assembled products of 14 ARGs ( $\beta$ -lactams [*acc-3*,  
203 *bla*<sub>IMP-2</sub>, *bla*<sub>IMP-5</sub>, *bla*<sub>IMP-12</sub> and *bla*<sub>OXA-2</sub>], macrolide-lincosamide-streptogramin B  
204 (*msrA*), methicillin (*mecA*), quinolones (*qnrB1*, *qnrB5* and *qnrS1*), tetracycline (*tetA*  
205 and *tetB*), and sulfonamides (*sul1* and *sul2*)), the class 1 integron gene (*int11*) and  
206 the KP06\_gp31 gene of the crAssphage, into the *XbaI* restriction site at the MCS of  
207 the pUC57 vector. The assembled sequence was synthesized and inserted by  
208 GenScript (Genscript, USA). Reference sequences for the ARGs were obtained

209 from The Comprehensive Antibiotic Resistance Database (CARD) (33) and primers  
 210 (Table 1) were designed using Primer-BLAST (NCBI) (34). A six point calibration  
 211 curve was generated using serial dilution from  $10^6$  to  $10^1$  copies of the plasmid.  
 212 The 16S rRNA housekeeping gene was used for the normalization of the absolute  
 213 quantification of ARGs.

214 **Table 1. Primers used for quantitative PCR experiments.**

| Gene                        | Forward (5' → 3')          | Reverse (5' → 3')             | Size [bp] | Ref.               |
|-----------------------------|----------------------------|-------------------------------|-----------|--------------------|
| <i>sul1</i>                 | GGATTTTTCTTGAGCCCCGC       | CACCGAGACCAATAGCGGAA          | 99        | This study         |
| <i>sul2</i>                 | TCATCTGCCAAACTCGTCGT       | CAAAGAACGCCGCAATGTGA          | 103       | This study         |
| <i>bla<sub>IMP-5</sub></i>  | CTTGGTTTGTGGAACGCGG        | TAAGCCACTCTATTCCGCC           | 87        | This study         |
| <i>bla<sub>IMP-2</sub></i>  | GAGCGCGTTTGCCTGATTA        | AGAAACAACACCCCAACCGT          | 95        | This study         |
| <i>bla<sub>IMP-12</sub></i> | TGAAGAGGTTAGCGGTTGGG       | CGCCCTACAAACCAAGCAAC          | 132       | This study         |
| <i>bla<sub>OXA-2</sub></i>  | GGTAGGATGGGTTGAGTGGC       | ATAGAGCGAAGGATTGCCCG          | 120       | This study         |
| <i>acc-3</i>                | GTTGCTACGCCGATTGTTCC       | GCGATGTAGGCACCAAACC           | 92        | This study         |
| <i>tetA</i>                 | TCAATTTCTGACGGGCTG         | GAAGCGAGCGGGTTGAGAG           | 91        | (35)               |
| <i>tetB</i>                 | AGTGCGCTTTGGATGCTGTA       | GCTGAGGTGGTATCGGCAAT          | 98        | This study         |
| <i>msrA</i>                 | CTGCTAACACAAGTACGATTCCAAAT | TCAAGTAAAGTTGTCTTACCTACACCATT | 89        | (36)               |
| <i>mecA</i>                 | GGTTACGGACAAGGTGAAATACTGAT | TGTCTTTTAATAAGTGAGGTGCGTTAATA | 106       | (36)               |
| <i>QnrB-1</i>               | GCGGCACTGAATTTATCGGC       | GGCATCTTTCAGCATCGCAC          | 86        | This study         |
| <i>QnrB-5</i>               | CGGGGTGTTGATTTACAAGGC      | GCCAATAATCGCGATGCCAA          | 84        | This study         |
| <i>Int1</i>                 | CAGCACCTTGCCGTAGAAGA       | GAGGCATTTCTGTCTGGCT           | 99        | This study         |
| crAss phage 16S rRNA        | AGGAGAAAGTGAACGTGGAACA     | AACGAGCACCAATTTTAAGCTTTA      | 78        | Modified from (20) |
|                             | CCTACGGGAGGCAGCAG          | TTACCGCGGCTGCTGGCAC           |           | (37)               |

215

216 For qPCR experiments, the reaction mix consisted in 12.5 µl of Power SYBR®  
217 Green PCR Master Mix (Applied Biosystems), BSA 0.1 µg/µl (New England  
218 Biolabs), 10 pmol of each primer, 2 µl of DNA, in a final volume of 25 µl. All qPCR  
219 experiments were performed in a LightCycler® 480 Instrument II (Roche Molecular  
220 Diagnosis), with the following conditions: an initial denaturalization cycle at 95 °C  
221 during 5 minutes, followed by 45 cycles of denaturalization at 95°C per 15  
222 seconds, and amplification at 60°C per 30 seconds. A melting curve was  
223 performed. All the qPCR experiments were performed at the Centre for  
224 Translational Microbiome Research (CTMR) Karolinska Institutet.

225 The absolute abundance of ARGs and *intl1* gene, was normalized to the  
226 absolute abundance of the 16S rRNA gene, as described before (6). The  
227 normalized abundance was corrected, in order to express the abundance of genes  
228 per bacteria, assuming that the average number of 16S rRNA genes per bacteria is  
229 four (6). Absolute abundance for the KP06\_gp31 gene (crAssphage) was  
230 considered for all the analysis.

## 231 **Statistical Analysis**

232 All statistical analysis were performed in the Software R 3.6.1. ANOVA test  
233 was performed for the account of statistically significant differences of  
234 physicochemical parameters between sites. Previously, the distribution of residues  
235 and the homogeneity of variance was analyzed using '*qqPlot*' and diagrams of  
236 dispersion respectively. When the data did not fit with the residue distribution  
237 and/or the homogeneity of variance, the '*Box-cox*' function was used to choose an  
238 appropriated transformation. When ANOVA test was significant, pairwise

239 comparisons among means via Post-hoc Tukey was performed to find out  
240 differences among sample sites. The package '*multcomp*' (version 1.4-10) was  
241 used for multiple comparisons. Pearson correlations were performed in order to  
242 evaluate correlation among physicochemical parameters and among quantified  
243 genes.

244 A heat map with hierarchical clustering ordination was performed to present  
245 the normalized abundance of the quantified genes, using the R package *gplots*  
246 (version 3.0.1.1).

247 A Principal Component Analysis (PCA) was performed in order to examine the  
248 relationship between the quantified genes, the contributions of fecal discharges,  
249 the physicochemical variables and the measured elements. Sampling points were  
250 ordered in function of the normalized abundance of ARGs and *Int11*. The two axis  
251 that explained most of the variation were extracted and a multiparametric linear  
252 regression (Lm) was used to relate the ordination of the sampling points along the  
253 axis with the environmental variables. The selection of the best regression model  
254 was automatically performed using the function '*regsubsets*' (backward and  
255 forward) from the package '*leaps*' (version 3.1) in function of R<sup>2</sup> adjusted values.  
256 The package '*car*' (version 3.0-3) was used to calculate the variance inflation factor  
257 (VIF) of the independent variables to avoid multicollinearity. The packages  
258 '*factoextra*' (version 1.0.6), and '*vegan*' (version 2.5-5) were employed for  
259 ordination analysis. Both data sets, the abundance of ARGs, *int11*, and the  
260 explaining variables (EC, pH, metal levels and the fecal pollution marker  
261 crAssphage) were logarithmically transformed before the analysis.

## 262 Results

### 263 Physicochemical conditions and metal levels

264 We first evaluated the physicochemical characteristics and metal concentration  
265 on every sampling site. The measurement of EC and pH from water samples was  
266 performed *in situ* and before the collection of sediments. As shown in Figure 2a,  
267 the shallow water lake of Milluni Chico (MC) presented the lowest pH levels  
268 ( $2.32 \pm 0.06$  in 3 samples). MC lake showed acid mining drainage (AMD) discharges  
269 and intense orange color. Pata Khota (PK) sampling sites, and the Uru Uru lake  
270 had pH values close to neutral (Fig 3a). The EC measurements showed that PK  
271 samples registered the lowest EC values, while MC and Uru Uru water samples  
272 showed a significant ten to twenty-fold increase compared to PK, with the  
273 exception of UP1 (Fig 2b).

274

275 **Fig 2. Physicochemical parameters and metal levels.** The mean values are  
276 shown in bars and standard deviation values are presented as the error-bars.  
277 Different letters represent statistically significant differences ( $p < 0.05$ ), calculated  
278 by ANOVA using the Software R 3.6.1. **(A)** pH of the water: MC sampling points,  
279 directly impacted by AMD presented the lowest pH. **(B)** Electrical conductivity (EC):  
280 PK samples presented the lowest values of EC, whereas wastewater and mining  
281 discharges receiving points presented higher values of EC. **(C)** Levels of quantified  
282 elements: The levels of metals in sediments are shown in bars with cumulative  
283 values. UP3 was the point with the highest level of all elements, followed by MC  
284 and UP1, all of them directly impacted by mining discharges, whereas, UP2 and

285 PKsamples presented the lowest levels of metals. **(D)** Principal Component  
286 Analysis (PCA) of physicochemical parameters and metal concentrations of  
287 sampling sites: All the sampling points in PK lake presented very similar values for  
288 the different environmental parameters, clustering together in the figure. The same  
289 was observed for MC sampling points, whereas Uru Uru sampling points did not  
290 cluster together, each of the samples presented a clear difference in their metal  
291 concentrations.

292

293 Sediments were quantified for the presence of 6 elements (As, Cd, Pb, Ni, Cu,  
294 and Zn). The results (Fig 2c) indicated clear differences between sample sites in  
295 their metal composition. UP3 (Uru Uru Lake) had the highest concentration of Zn  
296 (1811 mg Kg<sup>-1</sup> of sediment). In comparison with all other samples, statistically  
297 significant higher levels of As, Cd, Pb, Ni, and Cu, were found in UP3 except for Cu  
298 Cu levels in MC sediments. After UP3, MC samples were the second most  
299 abundant for all the elements analyzed, with significantly higher concentrations  
300 than UP2, and significantly higher concentrations of As, Cd, Ni, Cu and Zn in  
301 relation to PK samples, and also significantly higher than UP1 except for As, Cd,  
302 and Pb, levels. UP1 presented higher levels of As, Pb, Ni, and Cu than UP2. Thus,  
303 PK samples and UP2 were the sites with the lowest levels of all elements, except  
304 for Cu, with significantly higher concentrations in UP2. In summary, all the points  
305 directly impacted by mining activities (UP3 followed by MC sites and UP1)  
306 contained higher concentrations of As, Cd, Cu and Zn.

307 A Principal Component Analysis (PCA) was performed to visualize the  
308 distribution of the sampling points based on their environmental variables (Fig 2d).

309 All the sampling points in Pata Khota (PK) lake presented very similar values, and  
310 were grouped together. Similar trend was observed for Milluni Chico (MC)  
311 sampling points. In contrast, Uru Uru sampling points were clearly differentiated by  
312 their physicochemical parameters and metal concentrations.

313

314 The correlation analysis of all the physicochemical parameters, and metal  
315 levels (Fig. 3) showed that metals levels were positively correlated among them.  
316 EC and pH showed a negative correlation between them and no significant  
317 correlation with other environmental parameters was observed.

318

319 **Fig 3. Correlation among metals and physicochemical parameters.** The R  
320 correlation coefficient is represented in colors as indicated in the legend. Only  
321 significant correlations ( $p < 0.05$ ) were included. All elements showed positive  
322 correlation among them and with pH. EC and pH were negatively correlated.

323

## 324 **Detection and quantification of ARGs and MGEs**

325 In order to determine and quantify the presence of ARG, we extracted total  
326 DNA from the microbial communities present in the sediments and water from the  
327 sampled sites. The presence of ARGs was first screened by qPCR using the  
328 Microbial DNA Array for Antibiotic Resistance (Qiagen, Hilden, Germany) on PK  
329 and MC samples. Based on these results, a plasmid containing fourteen ARGs  
330 was designed and constructed. The ARGs sequences inserted included resistance  
331 to tetracycline (*tetA*, *tetB*),  $\beta$ -lactam antibiotics (*bla*<sub>OXA-2</sub>, *bla*<sub>IMP-2</sub>, *bla*<sub>IMP-5</sub>, *bla*<sub>IMP-12</sub>,

332 *acc-3*), methicillin (*mecA*), quinolones (*qnrB1*, *qnrB5* and *qnrS1*), and macrolide-  
333 lincosamide-streptogramin B (*msrA*) sulfamethoxazole (*sul1* and *sul2*). The latter  
334 two were not included in the screening arrays but were previously reported in the  
335 area (32). In addition the sequences of the bacteriophage crAssphage and Class 1  
336 integron (*intl1*), were inserted in the same plasmid. This plasmid was used to  
337 generate standard curves for all qPCR runs and samples analyzed.

338 The normalized abundance of these genes is shown in Fig 4. The *acc-3* genes  
339 were only detected in the Tagarete samples (UP2), both in sediments and water.  
340 The Class 1 Integron, together with *bla*<sub>OXA-2</sub> and *sul1* sequences were detected in  
341 all the samples. The fecal contamination marker crAssphage was only detected in  
342 sediments and water from Uru Uru and its tributaries, except for UP1 in which it  
343 was only present in water. The UP2 site that receives wastewater discharges  
344 presented the highest crAssphage abundance. In contrast crAssphage was not  
345 detected in PK and MC samples. In general, UP2 and UP3 samples were the ones  
346 with the highest abundance for the majority of the quantified genes, being *intl1*,  
347 *sul1*, *sul2* and *bla*<sub>OXA-2</sub> the most abundant. Except for PK3, the hierarchical  
348 clustering analysis revealed a distinct gene abundance between Milluni basin and  
349 Uru Uru sites.

350

351 **Fig 4. Normalized abundance of ARGs, *intl1* and CrAssphage detected on**  
352 **sediments and water.** The abundance values of ARGs and *intl1* were normalized  
353 in function of 16S rRNA gene abundance, absolute abundance of crAssphage is  
354 included. The data were transformed using Log<sub>(10)</sub> and represented in a heatmap  
355 where, reddish coloration symbolizes a higher abundance. Rows and columns



356 were ordered by similarity with a hierarchical clustering. CrAssphage was detected  
357 exclusively in Uru Uru samples, with the exception of UP1 sediments, UP2  
358 sampling sites presented the highest abundance of this gene and were the only  
359 ones with *acc3* gene signal. *int11*, *sul1*, and *bla*<sub>OXA-2</sub> were found in all samples, with  
360 similar abundance patterns, being most abundant in Uru Uru. S: sediments; W:  
361 water.

362

363 The correlations of the normalized abundance among all detected genes were  
364 evaluated (Fig 5). Class 1 integron was positively correlated with *sul1*, *sul2*, *bla*<sub>OXA-</sub>  
365 <sub>2</sub>, and *tetA* genes. Furthermore, these five genes had also positive correlation  
366 among them, except *sul2* and *tetA*. The abundance of *tetA* presented an inverse  
367 correlation with *bla*<sub>IMP-12</sub>. crAssphage absolute abundance was not correlated with  
368 the abundance of any other gene.

369

370 **Fig 5. Correlation among the detected genes.** R correlation coefficient is  
371 represented as a heat map of colors. Only significant correlations ( $p < 0.05$ ) are  
372 depicted. *int11* abundance positively correlated with the abundance of *sul1*, *sul2*,  
373 *bla*<sub>OXA-2</sub> and *tetA* genes, all these genes (with the exception of *tetA* with *sul2*)  
374 presented positive correlations among them. The fecal pollution marker did not  
375 correlate with any other gene.

376

377 **Fecal pollution and antibiotic resistance**

378 To evaluate if fecal pollution contributes to the abundance of *intl1* and ARGs, a  
379 one-way ANOVA was performed to compare the abundance of *intl1* between  
380 samples with and without the presence of crAssphage. Samples in which  
381 crAssphage was detected, presented a significantly higher abundance of *intl1*  
382 ( $p < 0.001$ ). Moreover, the abundance of each ARG that positively correlated with  
383 *intl1* (i.e. *sul1*, *sul2*, *bla*<sub>OXA-2</sub>, and *tetA*) presented a statistically higher abundance in  
384 sampling sites with positive signal for crAssphage (Fig 6).

385

386 **Fig 6. ANOVA of the abundance of ARGs and *intl1* in function to the presence**  
387 **of crAssphage.** By comparing the abundance of *intl1* between the samples with  
388 detected crAssphage and samples in which the fecal marker was not detected,  
389 statistically significant differences were found, being fecal polluted samples the  
390 ones with the highest abundance of *intl1* gene. The same pattern was found for  
391 *sul1*, *sul2*, *bla*<sub>OXA-2</sub> and *tetA*.

392

### 393 **Relationship between ARG and environmental variables**

394 To evaluate the relationship between the abundance of ARGs, *intl1*, fecal  
395 pollution (crAssphage) and the environmental factors (metal levels and  
396 physicochemical parameters) a PCA was performed. ARGs and *intl1* abundance  
397 were reduced into the first two principal components (PCs) that explained 69.5%  
398 and 16.3% of the variation respectively, these two PCs were recovered. A linear  
399 model was performed in order to see if along the PCs the ordination of the samples  
400 in function of the abundance of genes respond to any environmental variable (Fig

401 7). The linear regression showed that the PC1 presented a positive linear relation  
402 with crAssphage, pH, and EC (Adj.  $R^2 = 0.969$ ;  $F = 50.52$ ;  $p < 0.05$ ), suggesting that  
403 fecal pollution, a neutral pH value, and high EC are the three conditions related with  
404 higher abundance of ARGs and *intl1*. No statistically significant relationship was  
405 found for the second PC. We could not find any significant association between metal  
406 levels and gene abundances.

407

408 **Fig 7. Principal Component Analysis (PCA) and Multiple Regression.** The  
409 PCA was performed with the data of normalized gene abundance per site of ARGs  
410 and *intl1*. The first two PCA axis were recovered and used to perform a multiple  
411 linear regression (Lm) of the PCs with respect of the levels of metals, pH, EC, and  
412 the normalized abundance of the fecal pollution marker crAssphage. The  
413 parameters for the models were automatically selected in function of its  $R^2$   
414 adjusted value and its variance inflation factor (VIF) to avoid multicollinearity  
415 among environmental variables. The number in parenthesis represent the  
416 percentage of variation explained by the axis, and the parameters that are  
417 significantly related with the axis are represented with: \*  $p < 0.05$ , \*\*  $p < 0.001$  and  
418 \*\*\* $p < 0.0001$ . Related sampling points are indicated within purple circles. The  
419 abundance of *intl1* and the ARGs are represented as blue arrows, the direction of  
420 the arrow indicates increasing abundance of the genes. The angle of the arrows  
421 with respect to the axis represent the linear relation of the abundance with the PC,  
422 the orange circle is showing the most important variables (*intl1*, *sul1*, *sul2*, *bla*<sub>OXA-2</sub>,  
423 *tetA*) which show the lowest angles of their corresponding arrows with respect to

424 PC1. Along the PC1 the abundance of *intl1* and ARGs increase toward the right. S:  
425 sediments; W: water.

426

## 427 **Discussion**

428 To our knowledge, the present study is the first to explore the relationship  
429 between ARGs, metal pollution, and wastewater discharges. In order to establish  
430 these relationships, we analyzed the abundance of different ARGs and the class 1  
431 integron (*intl1*) in three water bodies. PK site, is a glacier lake which could be  
432 considered an ecological intact environment with very few anthropogenic activities  
433 around. Like PK, MC, is also a glacier lake but heavily impacted by mining  
434 discharges. UP, the third site, is a peri-urban lake with a long history of receiving  
435 both mining and wastewater discharges. Heavy metal levels were measured in  
436 sediment samples and we also quantified the human fecal pollution marker  
437 crAssphage along with the abundance of different ARGs. Our results suggest that  
438 fecal contribution was the major driver of increased abundance of *intl1* and ARGs  
439 included in this study. This conclusion offers a different scenario from what has been  
440 suggested in other studies that favor metals as selective agents of microbial  
441 antibiotic resistance (12-15), through co-selection process in the environment (11).  
442 However, it is important to note that fecal pollution was not considered in any of  
443 these studies. On the other hand, our results are in good agreement with a recent  
444 study that concluded ARGs abundance, in almost all cases, can be explained by the  
445 human fecal contributions in human impacted environments (18). Further analysis,  
446 especially metagenomic approaches, are needed to clarify whether the abundance

447 of ARGs, including those not detected in our analysis, is related to fecal pollution or  
448 metal contamination in water bodies impacted by both, mining activities and  
449 wastewater.

450 The absence of crAssphage suggests that PK is a pristine lake, while MC  
451 could be considered an extreme environment. MC samples presented very low pH,  
452 high EC and elevated metal levels (Fig 2) characteristics associated with AMD  
453 impacted sites (22). These features were expected as mining activities at large scale  
454 were performed in the Milluni area until 1990; since then, only small cooperatives  
455 operate in the valley (38). Our results support previous studies that indicate AMD  
456 discharges on surface water acidified and enriched metal (As, Fe, Pb, Cd, Zn, Cu,  
457 Sn) dissolution and mobility (26). Therefore, MC represents a very harsh  
458 environment for microbial life. Remarkably we were able to detect and quantify 4 out  
459 of 14 ARGs on this site. Whether these genes are functional and which species  
460 contain them is a topic that must be investigated in future studies. The Pata Khota  
461 lake, on the other hand, presented low metal levels, almost neutral pH and low EC,  
462 as expected for an intact ecological environment. The chemical composition of PK  
463 is characteristic of natural lakes at high altitudes in the mountains (27). The  
464 mineralogical composition explains the levels of metals found in this pristine site (26).  
465 The Milluni valley has little anthropogenic impact other than mining and camelid  
466 cattle raising for subsistence. Although, it has been shown that the crAssphage gene  
467 that we used can be found in water with animal fecal content (20), crAssphage could  
468 not be detected in Pata Khota and Milluni Chico (Fig 4). The latter could be explained  
469 because of the extreme conditions that may influence the survival of crAssphage

470 host in water. In the case of Pata Khota, the absence of this fecal pollution marker  
471 could reflect either, the absence of its host or the pristine character of this site.

472 In agreement with previous studies (28), Uru Uru lake was characterized by  
473 high EC and alkaline pH. UP3 presented the highest levels of metals among all  
474 points, followed by MC sampling points. UP1, a point that receives water from an  
475 old open pit gold mine transformed into an artificial meromictic lake presented  
476 lower values of metals compared with MC points. This observation could also  
477 explain why UP1 EC values are more similar to PK, the site considered pristine.  
478 Tagarete channel (UP2) metal levels were very low and similar to those of PK lake.  
479 UP2 receives wastewater discharges from Oruro city and disemboques in the Uru  
480 Uru lake (UP3). Consistent with this fecal pollution input, all Uru Uru samples  
481 (except UP1 sediments) were positive for the crAssphage marker. Therefore, Uru  
482 Uru sampling sites are simultaneously impacted by both fecal pollution and mining  
483 discharges.

484 We analyzed the abundance of fourteen ARGs, and the mobile genetic  
485 element *intl1*. Overall seven ARGs were detected in our samples, and *Intl1* was  
486 detected in all of them. The most abundant genes were *intl1*, *bla<sub>OXA-2</sub>*, *sul1* and  
487 *sul2*. All these genes presented positive correlations among them (Fig 5).  
488 Commonly *intl1* can be found in the environment positively correlated with several  
489 ARGs (6) and its abundance is strongly correlated with the abundance of multi-  
490 drug resistant bacteria (39). *intl1* and *sul1* are located together on MGEs and  
491 hence linked (40, 41). Previously, another study reported the presence of *sul1* and  
492 *sul2* in the Milluni valley, specifically in Pata Khota. When they analyzed the levels  
493 of sulfamethoxazole in water, the antibiotic was not detected (32) suggesting that

494 the presence of these genes can occur naturally in bacteria residing in these  
495 aquatic environments, as has been found in other pristine sites (42-44). Taking  
496 into consideration that PK and MC have little antropogenic activity around, and that  
497 antibiotic levels are reported undetectable in one of our study sites (32) we assume  
498 antibiotics will not play a major rol in our analysis. Although we did not measured  
499 antibiotic levels inour sampled sites, erythromycin levels were reported under the  
500 limit of detection or in the order of ng/g of sediment for UP1 and UP2 nearby sites,  
501 respectively (Guzman-Otazo *et al.* In preparation). Even if other antibiotics could  
502 be present, their levels would be expected to be residual, given the dilution effect  
503 that they encounter in these large water bodies. Furthermore, recent evidence  
504 suggest that antibiotic residual concentrations do not play an important role in  
505 ARGs abundance (18).

506 Some studies showed that metals such as Cu, Zn, Cd, and Ni can exert  
507 stronger selection pressure over environmental microbial communities favoring the  
508 selection of resistant bacteria, even more than antibiotics themselves (13, 45).  
509 Even though metal levels in MC were higher than in PK, we found similar ARGs  
510 abundance in both lakes. In fact, they clustered together according to its ARGs  
511 abundance (Fig 4) and were very close to each other in the PCA analysis (Fig 7).  
512 Samples collected in UP2, that drains sewage from Oruro city to UP3 presented  
513 the highest abundance of ARGs and *int1*. Remarkably, there are significantly  
514 higher levels of all the measured metals in UP3. However, the ARGs abundance in  
515 both sites grouped together in the hierarchical clustering analysis (Fig 4). These  
516 results suggest that other parameters different from metal levels are explaining the  
517 variation in ARGs abundance.

518 Previous studies reported positive correlations of ARGs and crAssphage (18,  
519 46, 47). The hierarchical clustering analysis (Fig 4) revealed that higher levels of  
520 crAssphage grouped most of the UP2 and UP3 samples, which at the same time  
521 presented the highest levels of six out of the seven quantified genes. Also, we  
522 showed that samples with and without fecal pollution presented statistically  
523 significant differences in the abundance of *intl1*, *sul1*, *sul2*, *bla*<sub>OXA-2</sub> and *tetA* (Fig 6).  
524 All these genes presented a positive strong correlation among them, but no  
525 individual correlation between the abundance of crAssphage and the other genes  
526 were found (Fig 5). These findings could be explained by the low number of  
527 crAssphage positive samples (only five). Moreover, the Tagarete channel strongly  
528 impacted by fecal discharges was the only point in which *acc-3* was detected,  
529 suggesting that the accumulation of bacteria from feces might be the main source of  
530 ARGs. Other studies used crAssphage as a molecular marker able to track human  
531 fecal pollution in aquatic environments (20, 48). Our results support the use of  
532 crAssphage as a marker for human fecal pollution and as a proxy to predict the  
533 presence of ARGs in wastewater impacted aquatic environments (46, 47).

534 Our PCA results on *intl1* and ARGs abundance showed that PC1 (69.5% of  
535 the variation) had a strong linear relationship with *Intl1*, *sul1*, *sul2*, *bla*<sub>OXA-2</sub> and *tetA*.  
536 A multiparametric linear model revealed that the most important factors explaining  
537 this variation in this axis were EC, neutral pH, and crAssphage abundance. EC is an  
538 indicator of anthropogenic impact as values increase with mining and sewage  
539 discharges (22, 49). It is well known that pH is considered the most important factor  
540 influencing the microbial community composition in soils (50, 51), and microbial  
541 community composition is the most important factor determining the resistome in



542 soils at continental levels (52). Therefore, it is possible that both pH and EC are  
543 indirectly conditioning the resistome in mining and wastewater impacted  
544 environments. It is important to note that pH values were only measured in water of  
545 each sampling site. Although overlying waters do not necessarily correlate with the  
546 pH of sediments in acidified environments (53), previous studies on the Milluni basin  
547 (26) reported similar sediment pH values.

548         Taken together our results suggest that likely fecal pollution but not metal  
549 contamination better explains the abundance of ARGs associated with *intl1* in  
550 aquatic environments impacted by both, mining and wastewater discharges. Other  
551 important factors explaining the abundance of ARGs are the physicochemical  
552 conditions (pH and EC), which can determine the composition of microbial  
553 communities and, thus, the resistome in these environments.

554

## 555 **Acknowledgements**

556 The authors thank Dario Acha for help with the metal analysis and Nataniel Mamani  
557 for his technical assistance. This study was supported by grants from the Swedish  
558 Research Council to ÅS, EJ, SG-C and CC (dnr 2017-05423 and 2019-04202), and  
559 a bolivian grant from Impuesto Directo a los Hidrocarburos to SG-C (IDH 2013-  
560 2014).

561

## 562 **References**

- 563 1. Llor C, Bjerrum L. Antimicrobial resistance: risk associated with antibiotic  
564 overuse and initiatives to reduce the problem. *Therapeutic Advances in Drug*  
565 *Safety*. 2014;5(6):229-41.
- 566 2. Berendonk TU, Manaia CM, Merlin C, Fatta-Kassinos D, Cytryn E, Walsh F,  
567 et al. Tackling antibiotic resistance: the environmental framework. *Nature reviews*  
568 *Microbiology*. 2015;13(5):310-7.
- 569 3. Gillings MR, Westoby M, Ghaly TM. Pollutants That Replicate: Xenogenetic  
570 DNAs. *Trends Microbiol*. 2018.
- 571 4. Marti E, Variatza E, Balcazar JL. The role of aquatic ecosystems as  
572 reservoirs of antibiotic resistance. *Trends Microbiol*. 2014;22(1):36-41.
- 573 5. Chu BTT, Petrovich ML, Chaudhary A, Wright D, Murphy B, Wells G, et al.  
574 *Metagenomics Reveals the Impact of Wastewater Treatment Plants on the*  
575 *Dispersal of Microorganisms and Genes in Aquatic Sediments*. *Applied and*  
576 *Environmental Microbiology*. 2018;84(5).
- 577 6. Zhu Y-G, Zhao Y, Li B, Huang C-L, Zhang S-Y, Yu S, et al. Continental-  
578 scale pollution of estuaries with antibiotic resistance genes. *Nature Microbiology*.  
579 2017;2:16270.
- 580 7. Jutkina J, Marathe NP, Flach CF, Larsson DGJ. Antibiotics and common  
581 antibacterial biocides stimulate horizontal transfer of resistance at low  
582 concentrations. *Science of The Total Environment*. 2018;616-617:172-8.
- 583 8. Nesme J, Cecillon S, Delmont TO, Monier JM, Vogel TM, Simonet P. Large-  
584 scale metagenomic-based study of antibiotic resistance in the environment. *Curr*  
585 *Biol*. 2014;24(10):1096-100.

- 586 9. Navarro MC, Pérez-Sirvent C, Martínez-Sánchez MJ, Vidal J, Tovar PJ,  
587 Bech J. Abandoned mine sites as a source of contamination by heavy metals: A  
588 case study in a semi-arid zone. *Journal of Geochemical Exploration*.  
589 2008;96(2):183-93.
- 590 10. Liu J, Yin M, Luo X, Xiao T, Wu Z, Li N, et al. The mobility of thallium in  
591 sediments and source apportionment by lead isotopes. *Chemosphere*.  
592 2019;219:864-74.
- 593 11. Baker-Austin C, Wright MS, Stepanauskas R, McArthur JV. Co-selection of  
594 antibiotic and metal resistance. *Trends in Microbiology*. 2006;14(4):176-82.
- 595 12. Zhao Y, Cocerva T, Cox S, Tardif S, Su J-Q, Zhu Y-G, et al. Evidence for  
596 co-selection of antibiotic resistance genes and mobile genetic elements in metal  
597 polluted urban soils. *Science of The Total Environment*. 2019;656:512-20.
- 598 13. Song J, Rensing C, Holm PE, Virta M, Brandt KK. Comparison of Metals  
599 and Tetracycline as Selective Agents for Development of Tetracycline Resistant  
600 Bacterial Communities in Agricultural Soil. *Environ Sci Technol*. 2017;51(5):3040-7.
- 601 14. Zhao Z, Wang J, Han Y, Chen J, Liu G, Lu H, et al. Nutrients, heavy metals  
602 and microbial communities co-driven distribution of antibiotic resistance genes in  
603 adjacent environment of mariculture. *Environmental Pollution*. 2016.
- 604 15. Gao P, He S, Huang S, Li K, Liu Z, Xue G, et al. Impacts of coexisting  
605 antibiotics, antibacterial residues, and heavy metals on the occurrence of  
606 erythromycin resistance genes in urban wastewater. *Appl Microbiol Biotechnol*.  
607 2015;99(9):3971-80.

- 608 16. Taylor NG, Verner-Jeffreys DW, Baker-Austin C. Aquatic systems:  
609 maintaining, mixing and mobilising antimicrobial resistance? *Trends Ecol Evol*.  
610 2011;26(6):278-84.
- 611 17. Baquero F, Martínez J-L, Cantón R. Antibiotics and antibiotic resistance in  
612 water environments. *Current Opinion in Biotechnology*. 2008;19(3):260-5.
- 613 18. Karkman A, Pärnänen K, Larsson DGJ. Fecal pollution can explain antibiotic  
614 resistance gene abundances in anthropogenically impacted environments. *Nature*  
615 *communications*. 2019;10(1):80.
- 616 19. Dutilh BE, Cassman N, McNair K, Sanchez SE, Silva GG, Boling L, et al. A  
617 highly abundant bacteriophage discovered in the unknown sequences of human  
618 faecal metagenomes. *Nature communications*. 2014;5:4498.
- 619 20. García-Aljaro C, Ballesté E, Muniesa M, Jofre J. Determination of  
620 crAssphage in water samples and applicability for tracking human faecal pollution.  
621 *Microbial biotechnology*. 2017;10(6):1775-80.
- 622 21. Huang X, Sillanpää M, Gjessing ET, Peräniemi S, Vogt RD. Environmental  
623 impact of mining activities on the surface water quality in Tibet: Gyama valley.  
624 *Science of The Total Environment*. 2010;408(19):4177-84.
- 625 22. Gray NF. Field assessment of acid mine drainage contamination in surface  
626 and ground water. *Environmental Geology*. 1996;27(4):358-61.
- 627 23. Satgé F, Hussain Y, Xavier A, Zolá RP, Salles L, Timouk F, et al. Unraveling  
628 the impacts of droughts and agricultural intensification on the Altiplano water  
629 resources. *Agricultural and Forest Meteorology*. 2019;279:107710.
- 630 24. Poma V, Mamani N, Iñiguez V. Impact of urban contamination of the La Paz  
631 River basin on thermotolerant coliform density and occurrence of multiple antibiotic

- 632 resistant enteric pathogens in river water, irrigated soil and fresh vegetables.  
633 SpringerPlus. 2016;5(1).
- 634 25. Guzman-Otazo J, Gonzales-Siles L, Poma V, Bengtsson-Palme J, Thorell K,  
635 Flach CF, et al. Diarrheal bacterial pathogens and multi-resistant enterobacteria in  
636 the Choqueyapu River in La Paz, Bolivia. PLoS One. 2019;14(1):e0210735.
- 637 26. Salvarredy-Aranguren MM, Probst A, Roulet M, Isaure M-P. Contamination  
638 of surface waters by mining wastes in the Milluni Valley (Cordillera Real, Bolivia):  
639 Mineralogical and hydrological influences. Applied Geochemistry. 2008;23(5):1299-  
640 324.
- 641 27. Driesen K. Contamination of surface waters by the former mining industry in  
642 the Milluni Valley (Cordillera Real, Bolivia) and the application of the water planning  
643 model WEAP. Bélgica: University College Ghent; 2012.
- 644 28. Alanoca L, Guedron S, Amouroux D, Audry S, Monperrus M, Tessier E, et  
645 al. Synergistic effects of mining and urban effluents on the level and distribution of  
646 methylmercury in a shallow aquatic ecosystem of the Bolivian Altiplano. Environ  
647 Sci Process Impacts. 2016;18(12):1550-60.
- 648 29. Zamora Echenique G, Mata Parello J, Quezada H R. Propuesta de  
649 "Geoparque Oruro – Bolivia" Alternativa para la preservación del patrimonio  
650 geológico, minero y sociocultural. REV MAMYM. 2018(5):19 - 33.
- 651 30. Guedron S, Point D, Acha D, Bouchet S, Baya PA, Tessier E, et al. Mercury  
652 contamination level and speciation inventory in Lakes Titicaca & Uru-Uru (Bolivia):  
653 Current status and future trends. Environmental pollution (Barking, Essex : 1987).  
654 2017;231(Pt 1):262-70.

- 655 31. Fang Y, Xu M, Chen X, Sun G, Guo J, Wu W, et al. Modified pretreatment  
656 method for total microbial DNA extraction from contaminated river sediment.  
657 *Frontiers of Environmental Science & Engineering*. 2015;9(3):444-52.
- 658 32. Archundia D, Duwig C, Lehembre F, Chiron S, Morel MC, Prado B, et al.  
659 Antibiotic pollution in the Katari subcatchment of the Titicaca Lake: Major  
660 transformation products and occurrence of resistance genes. *Sci Total Environ*.  
661 2017;576:671-82.
- 662 33. Alcock BP, Raphenya AR, Lau TTY, Tsang KK, Bouchard M, Edalatmand A,  
663 et al. CARD 2020: antibiotic resistome surveillance with the comprehensive  
664 antibiotic resistance database. *Nucleic Acids Res*. 2020;48(D1):D517-d25.
- 665 34. Ye J, Coulouris G, Zaretskaya I, Cutcutache I, Rozen S, Madden TL.  
666 Primer-BLAST: a tool to design target-specific primers for polymerase chain  
667 reaction. *BMC Bioinformatics*. 2012;13:134.
- 668 35. Nolvak H, Truu M, Truu J. Evaluation of quantitative real-time PCR workflow  
669 modifications on 16S rRNA and tetA gene quantification in environmental samples.  
670 *Sci Total Environ*. 2012;426:351-8.
- 671 36. Zhu Y-G, Johnson TA, Su J-Q, Qiao M, Guo G-X, Stedtfeld RD, et al.  
672 Diverse and abundant antibiotic resistance genes in Chinese swine farms.  
673 *Proceedings of the National Academy of Sciences*. 2013;110(9):3435-40.
- 674 37. Zhang Z, Qu Y, Li S, Feng K, Wang S, Cai W, et al. Soil bacterial  
675 quantification approaches coupling with relative abundances reflecting the changes  
676 of taxa. *Scientific reports*. 2017;7(1):4837.

- 677 38. Rios C. Estudio de la Contaminación Ambiental por las Descargas Mineras  
678 de Comsur en la Represa Milluni. La Paz, Bolivia.: Universidad Mayor de San  
679 Andres; 1985.
- 680 39. Lucassen R, Rehberg L, Heyden M, Bockmühl D. Strong correlation of total  
681 phenotypic resistance of samples from household environments and the  
682 prevalence of class 1 integrons suggests for the use of the relative prevalence of  
683 intl1 as a screening tool for multi-resistance. PLOS ONE. 2019;14(6):e0218277.
- 684 40. Uyaguari-Díaz MI, Croxen MA, Luo Z, Cronin KI, Chan M, Baticados WN, et  
685 al. Human Activity Determines the Presence of Integron-Associated and Antibiotic  
686 Resistance Genes in Southwestern British Columbia. Frontiers in microbiology.  
687 2018;9:852-.
- 688 41. Gillings MR, Gaze WH, Pruden A, Smalla K, Tiedje JM, Zhu Y-G. Using the  
689 class 1 integron-integrase gene as a proxy for anthropogenic pollution. The ISME  
690 journal. 2015;9(6):1269-79.
- 691 42. Storteboom H, Arabi M, Davis JG, Crimi B, Pruden A. Tracking Antibiotic  
692 Resistance Genes in the South Platte River Basin Using Molecular Signatures of  
693 Urban, Agricultural, And Pristine Sources. Environmental Science & Technology.  
694 2010;44(19):7397-404.
- 695 43. Ouyang W-Y, Huang F-Y, Zhao Y, Li H, Su J-Q. Increased levels of  
696 antibiotic resistance in urban stream of Jiulongjiang River, China. Applied  
697 Microbiology and Biotechnology. 2015;99(13):5697-707.
- 698 44. Van Goethem MW, Pierneef R, Bezuidt OKI, Van De Peer Y, Cowan DA,  
699 Makhalanyane TP. A reservoir of 'historical' antibiotic resistance genes in remote  
700 pristine Antarctic soils. Microbiome. 2018;6(1):40.

- 701 45. Stepanauskas R, Glenn TC, Jagoe CH, Tuckfield RC, Lindell AH, King CJ,  
702 et al. Coselection for microbial resistance to metals and antibiotics in freshwater  
703 microcosms. *Environmental Microbiology*. 2006;8(9):1510-4.
- 704 46. Stachler E, Crank K, Bibby K. Co-Occurrence of crAssphage with Antibiotic  
705 Resistance Genes in an Impacted Urban Watershed. *Environmental Science &*  
706 *Technology Letters*. 2019;6(4):216-21.
- 707 47. Chen H, Bai X, Li Y, Jing L, Chen R, Teng Y. Source identification of  
708 antibiotic resistance genes in a peri-urban river using novel crAssphage marker  
709 genes and metagenomic signatures. *Water research*. 2019;167:115098.
- 710 48. Stachler E, Akyon B, de Carvalho NA, Ference C, Bibby K. Correlation of  
711 crAssphage qPCR Markers with Culturable and Molecular Indicators of Human  
712 Fecal Pollution in an Impacted Urban Watershed. *Environmental Science &*  
713 *Technology*. 2018;52(13):7505-12.
- 714 49. Pal M, Samal N, Roy P, Biswas Roy M. Electrical Conductivity of Lake  
715 Water as Environmental Monitoring –A Case study of Rudra sagar Lake. *Journal of*  
716 *Environmental Science, Toxicology and Food Technology*. 2015.
- 717 50. Lauber CL, Hamady M, Knight R, Fierer N. Pyrosequencing-Based  
718 Assessment of Soil pH as a Predictor of Soil Bacterial Community Structure at the  
719 Continental Scale. *Applied and Environmental Microbiology*. 2009;75(15):5111-20.
- 720 51. Bahram M, Hildebrand F, Forslund SK, Anderson JL, Soudzilovskaia NA,  
721 Bodegom PM, et al. Structure and function of the global topsoil microbiome.  
722 *Nature*. 2018;560(7717):233-7.



- 723 52. Forsberg KJ, Patel S, Gibson MK, Lauber CL, Knight R, Fierer N, et al.  
724 Bacterial phylogeny structures soil resistomes across habitats. *Nature*.  
725 2014;509(7502):612-6.
- 726 53. Herlihy AT, Mills AL. The pH regime of sediments underlying acidified  
727 waters. *Biogeochemistry*. 1986;2(1):95-9.
- 728

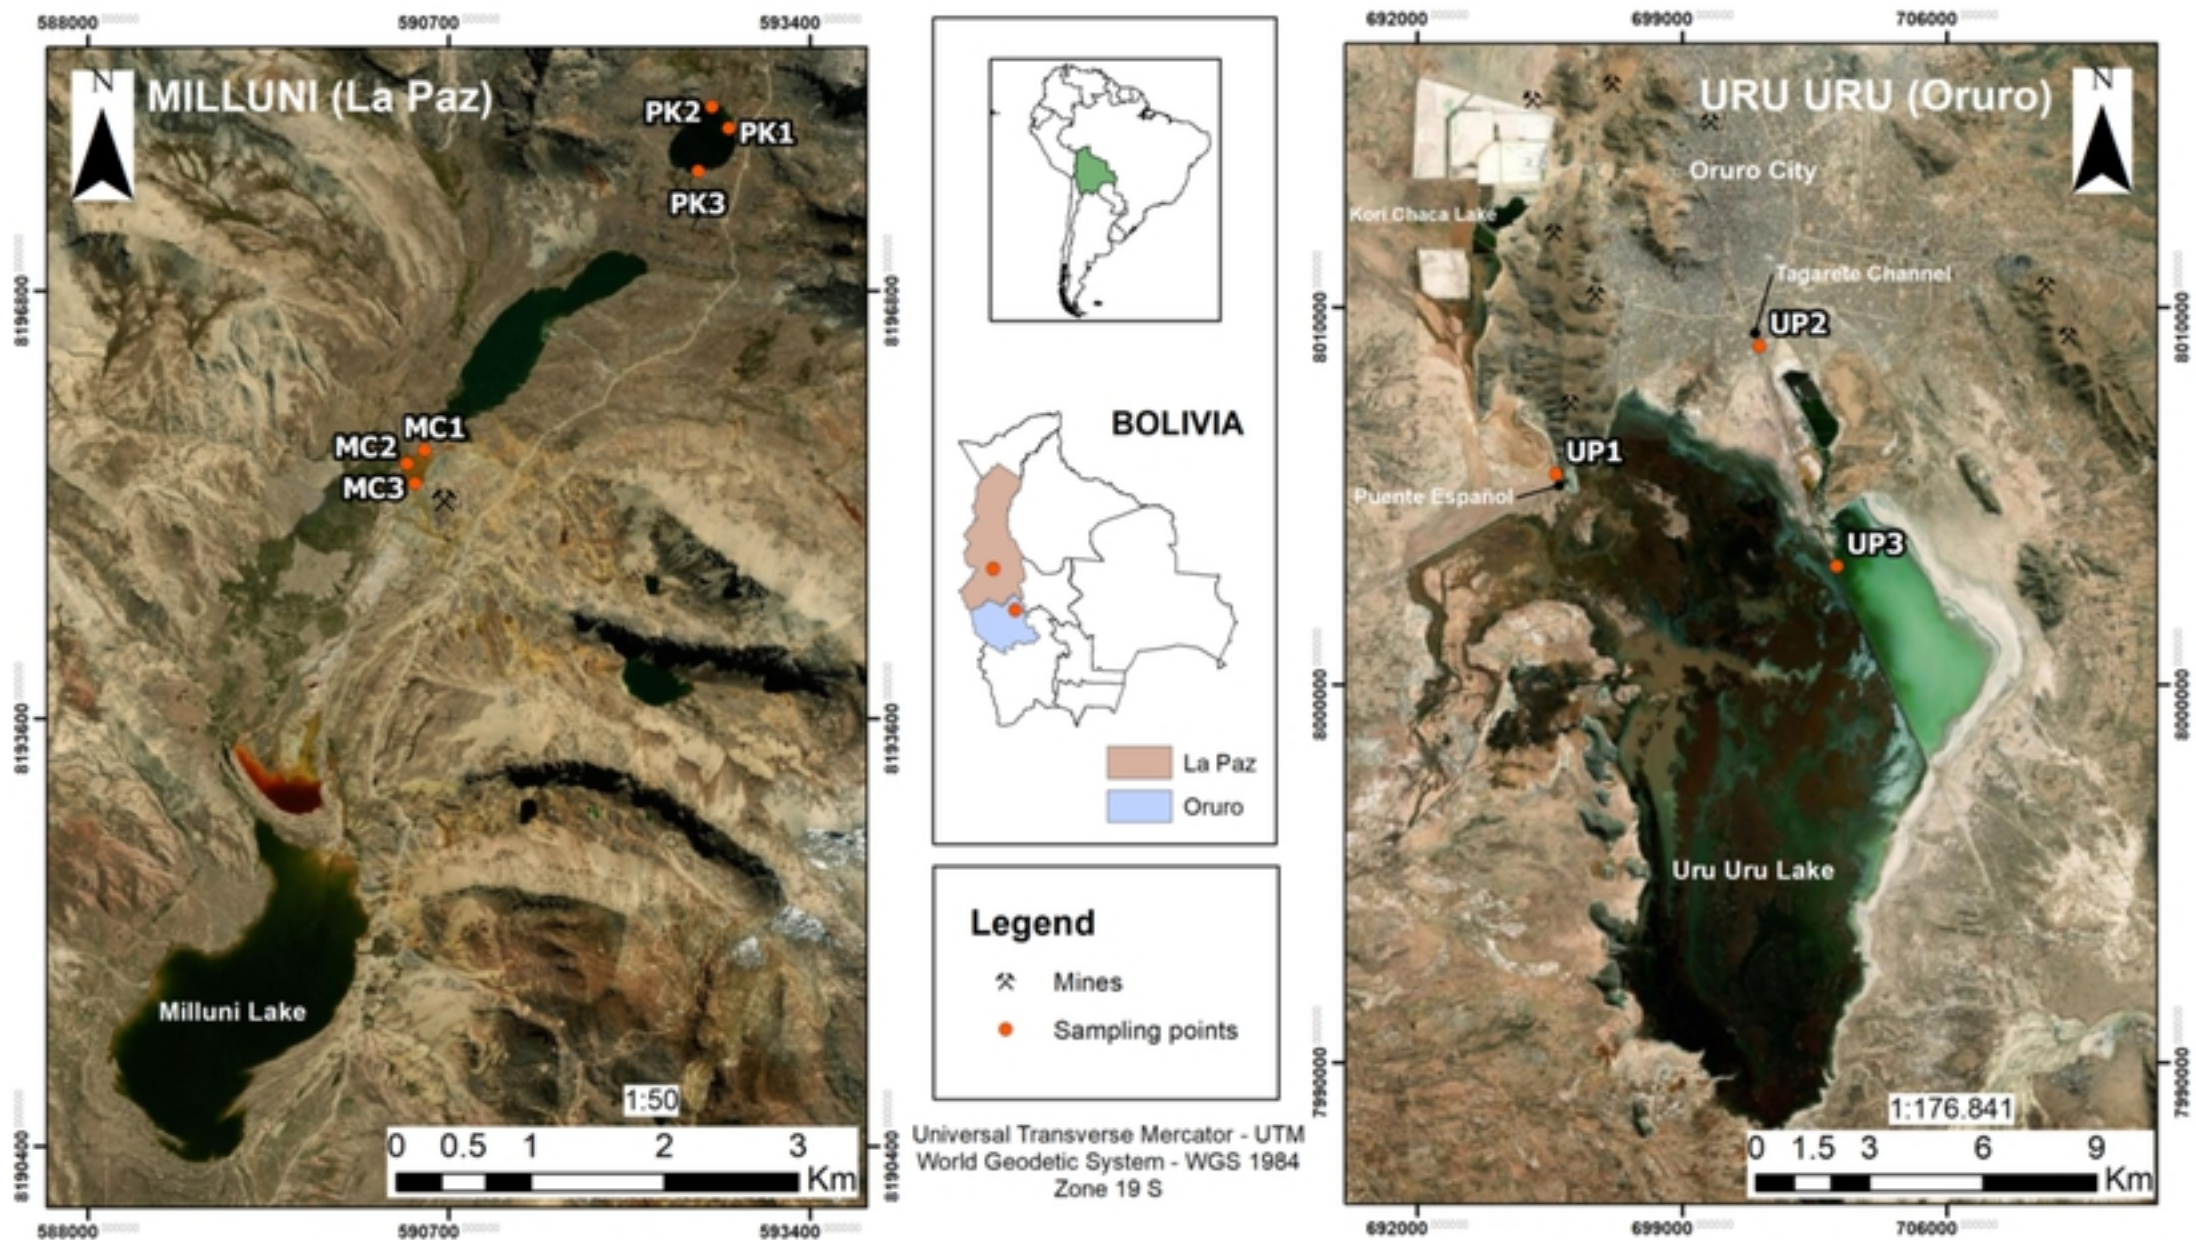

Figure 1

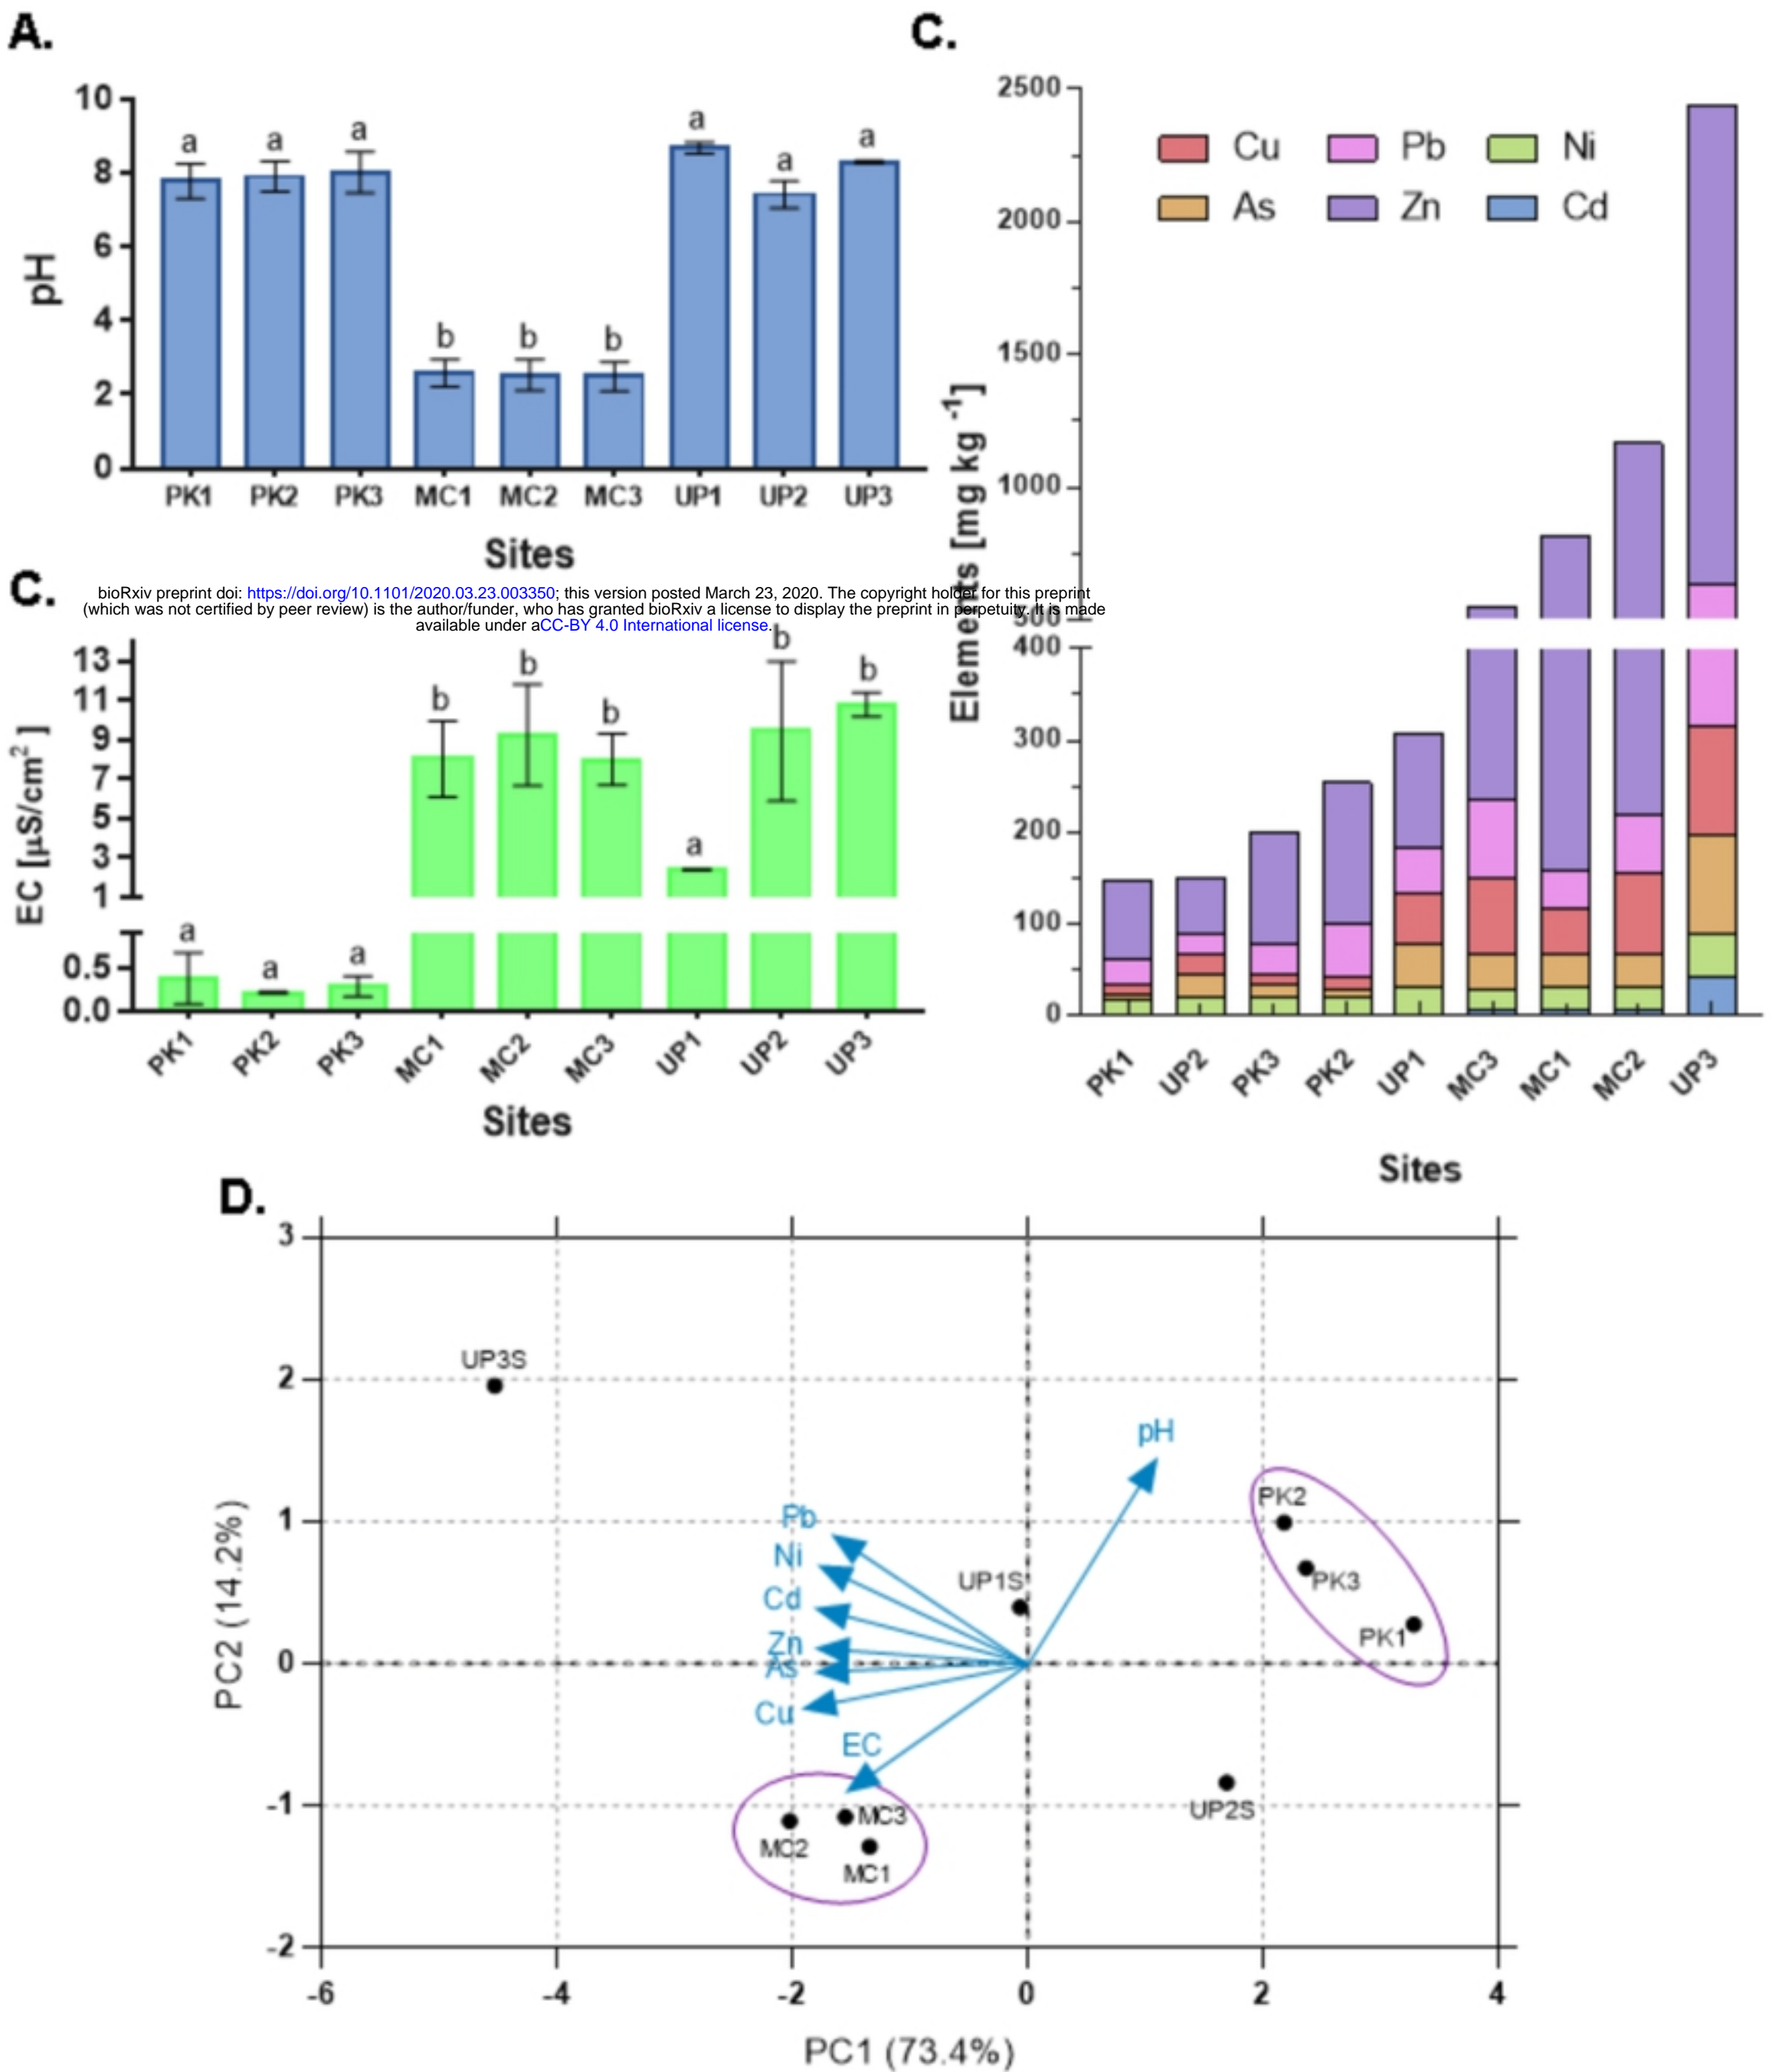

Figure 2

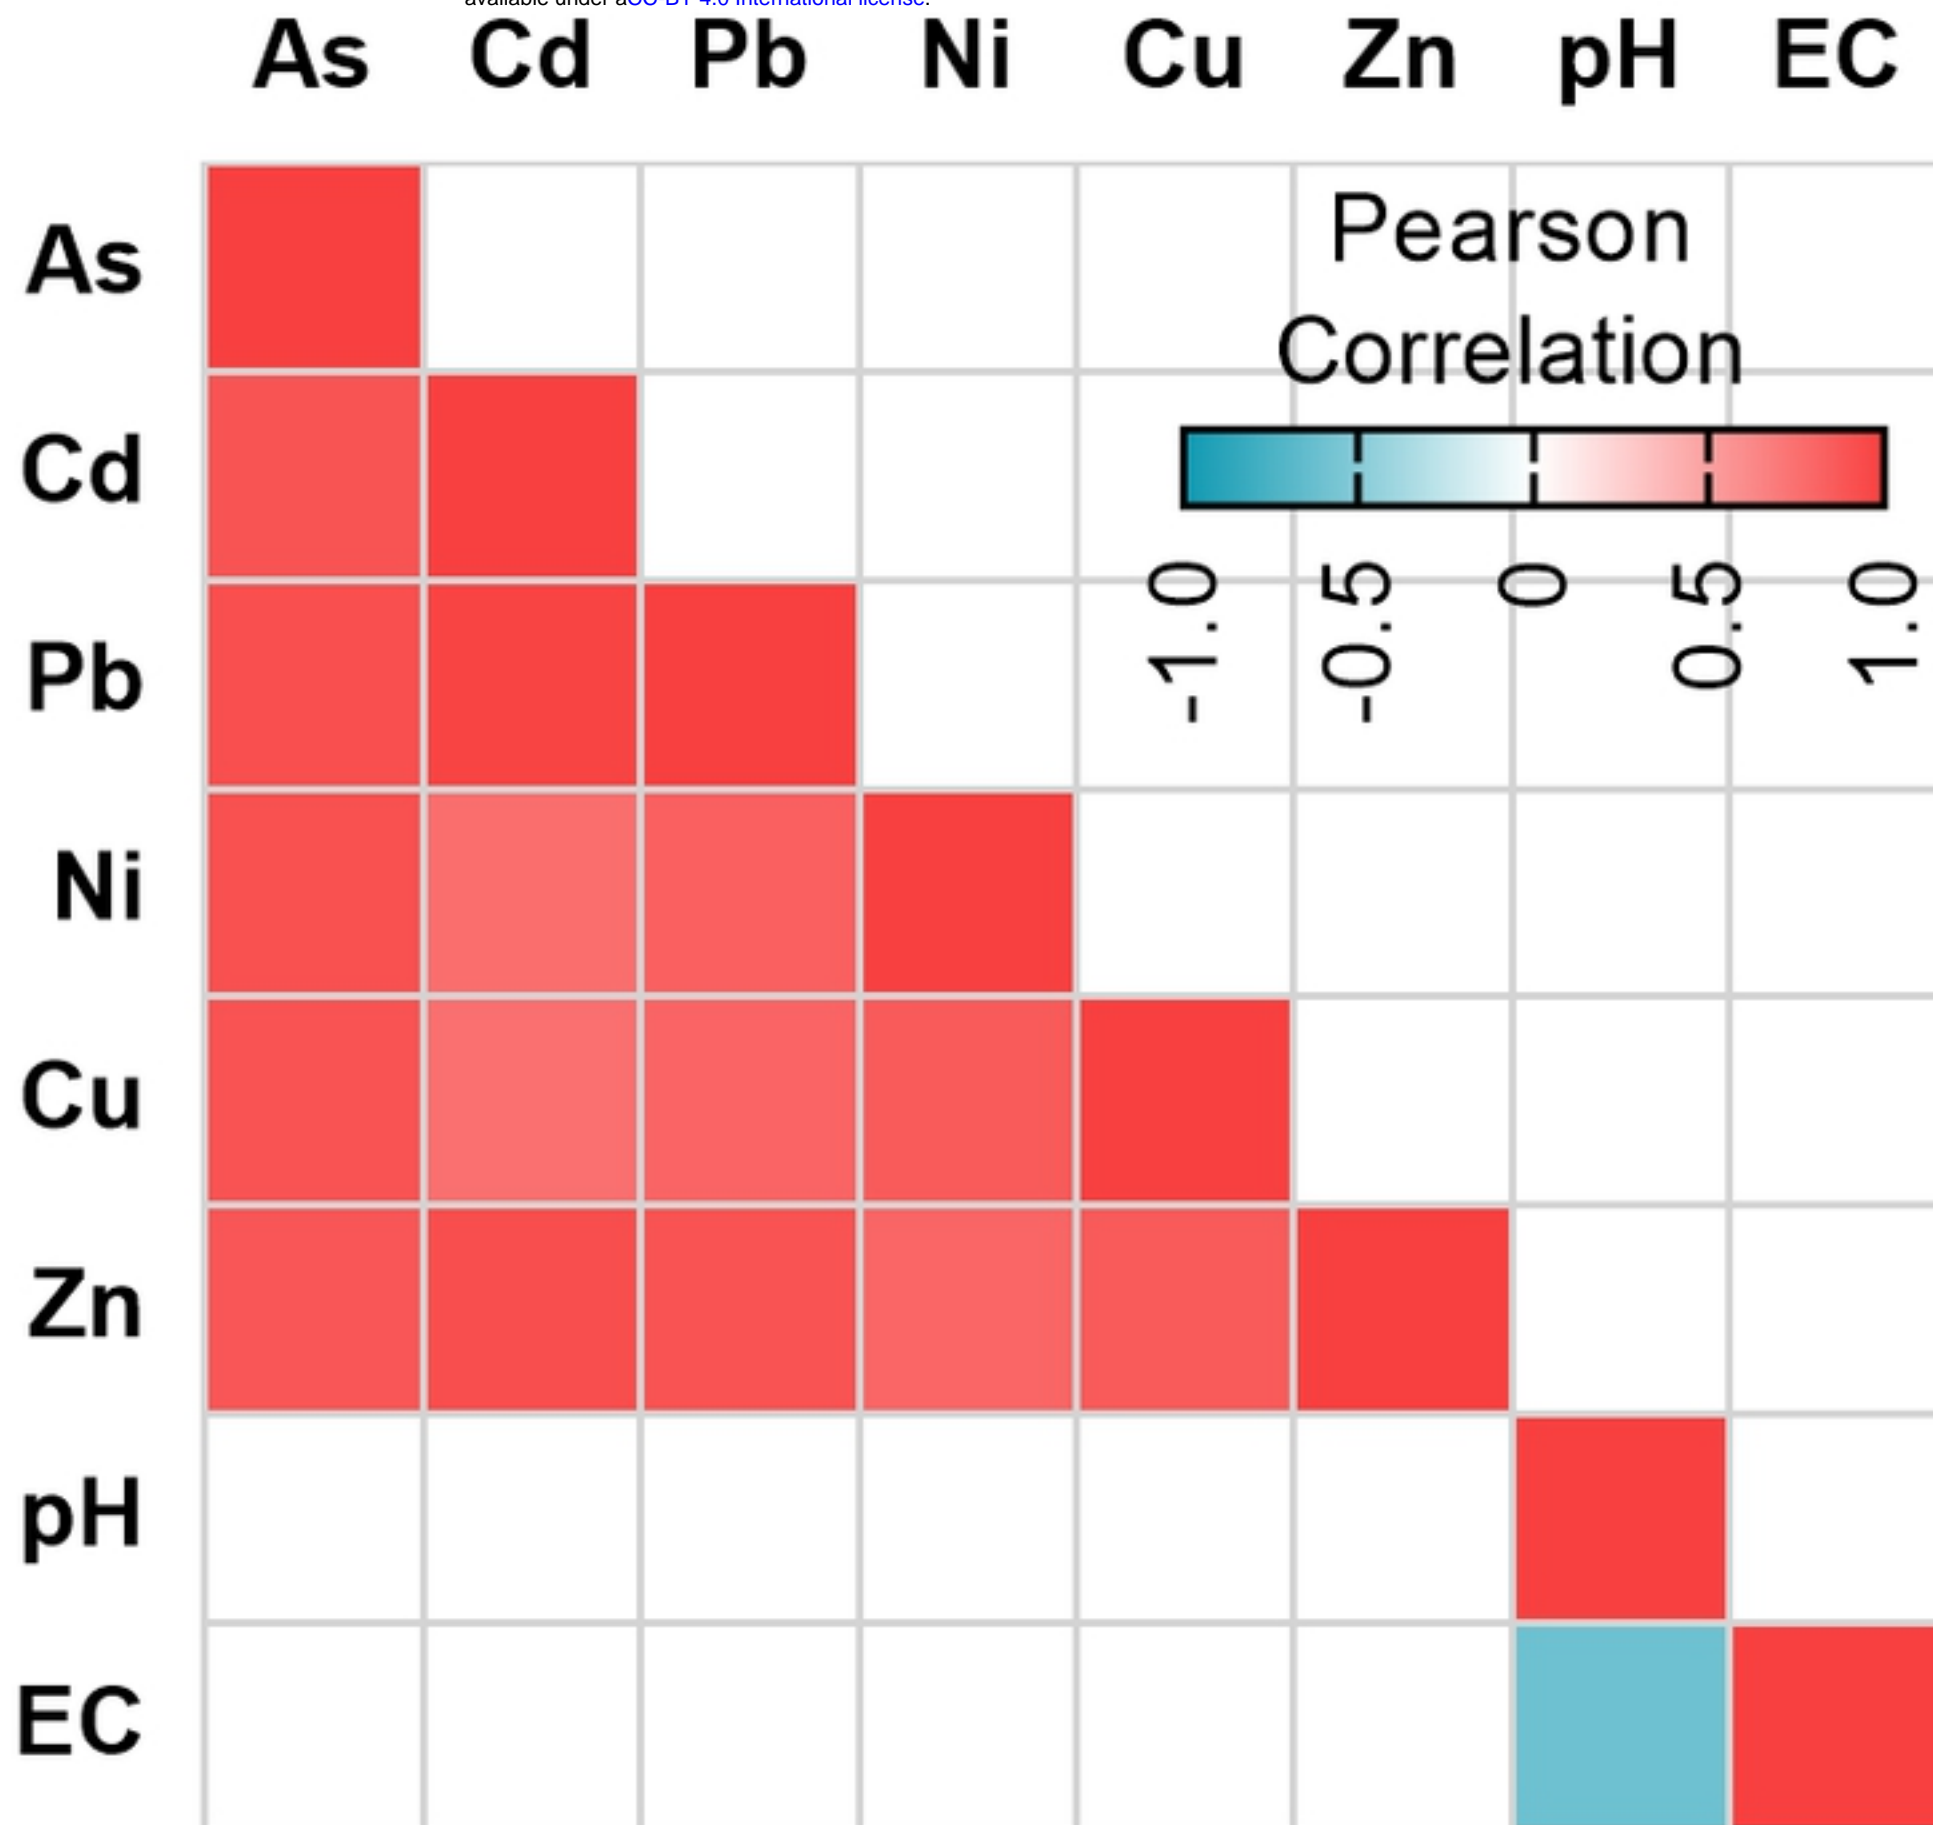

Figure 3



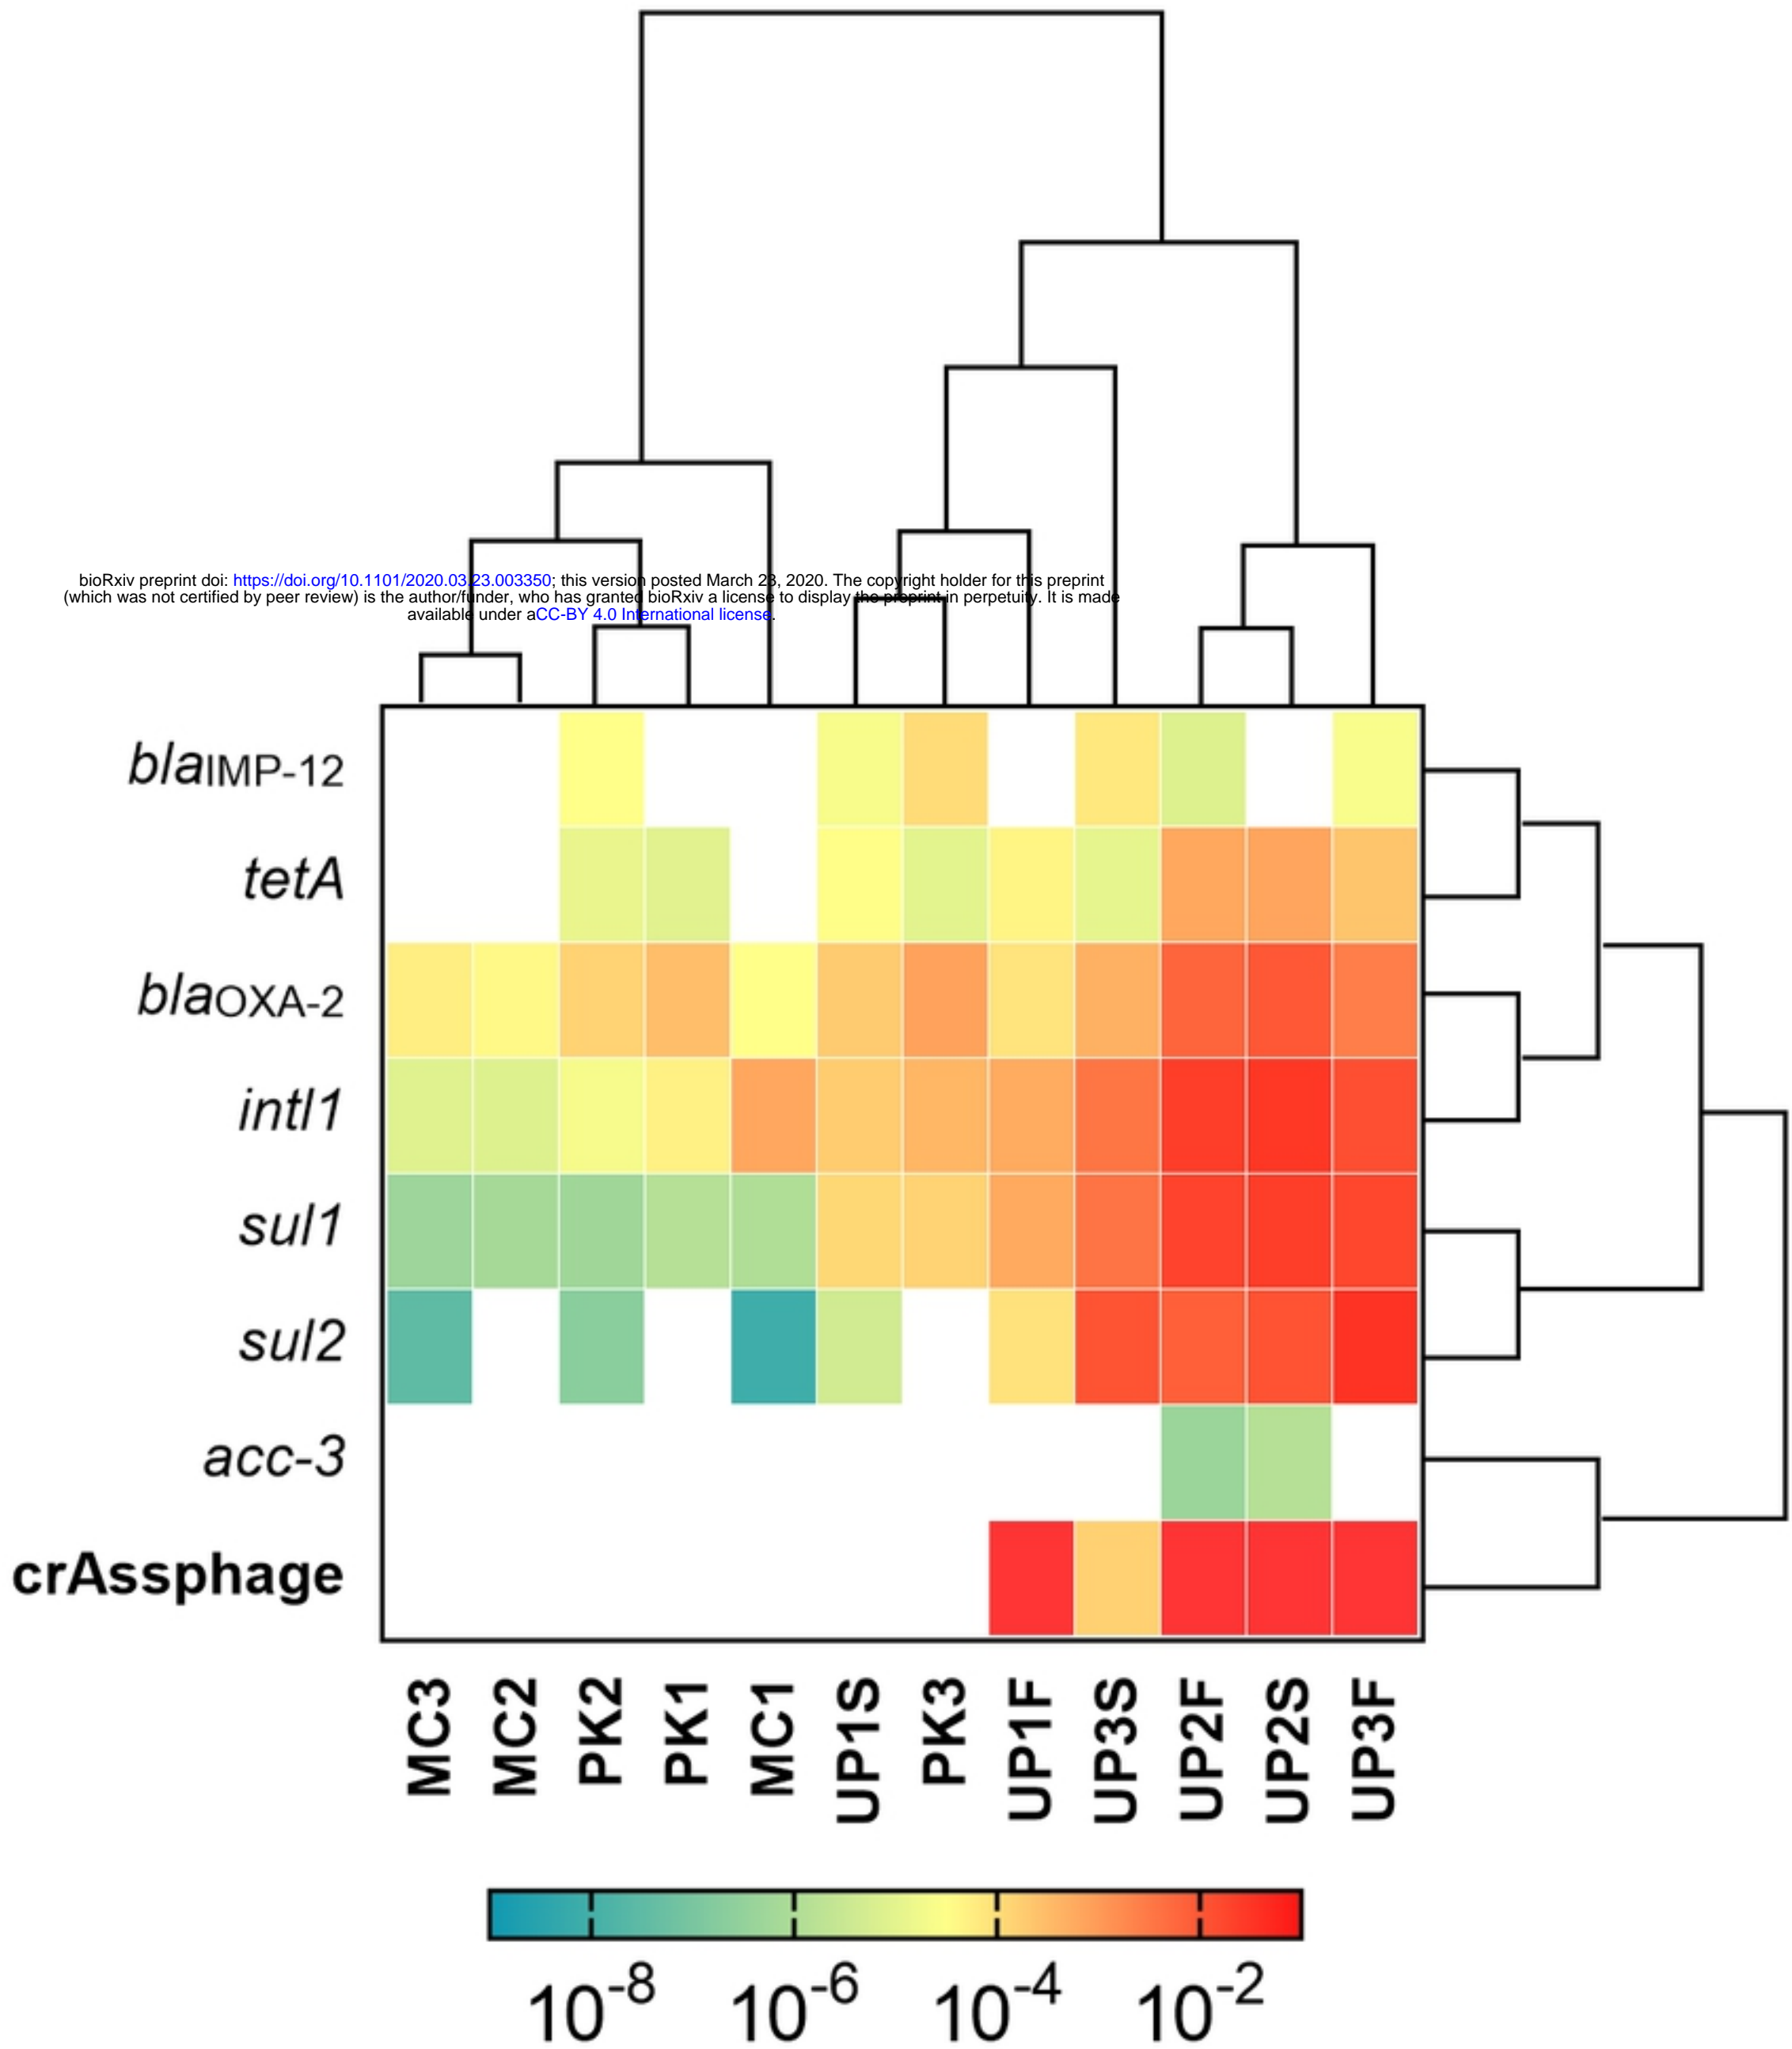

Figure 4

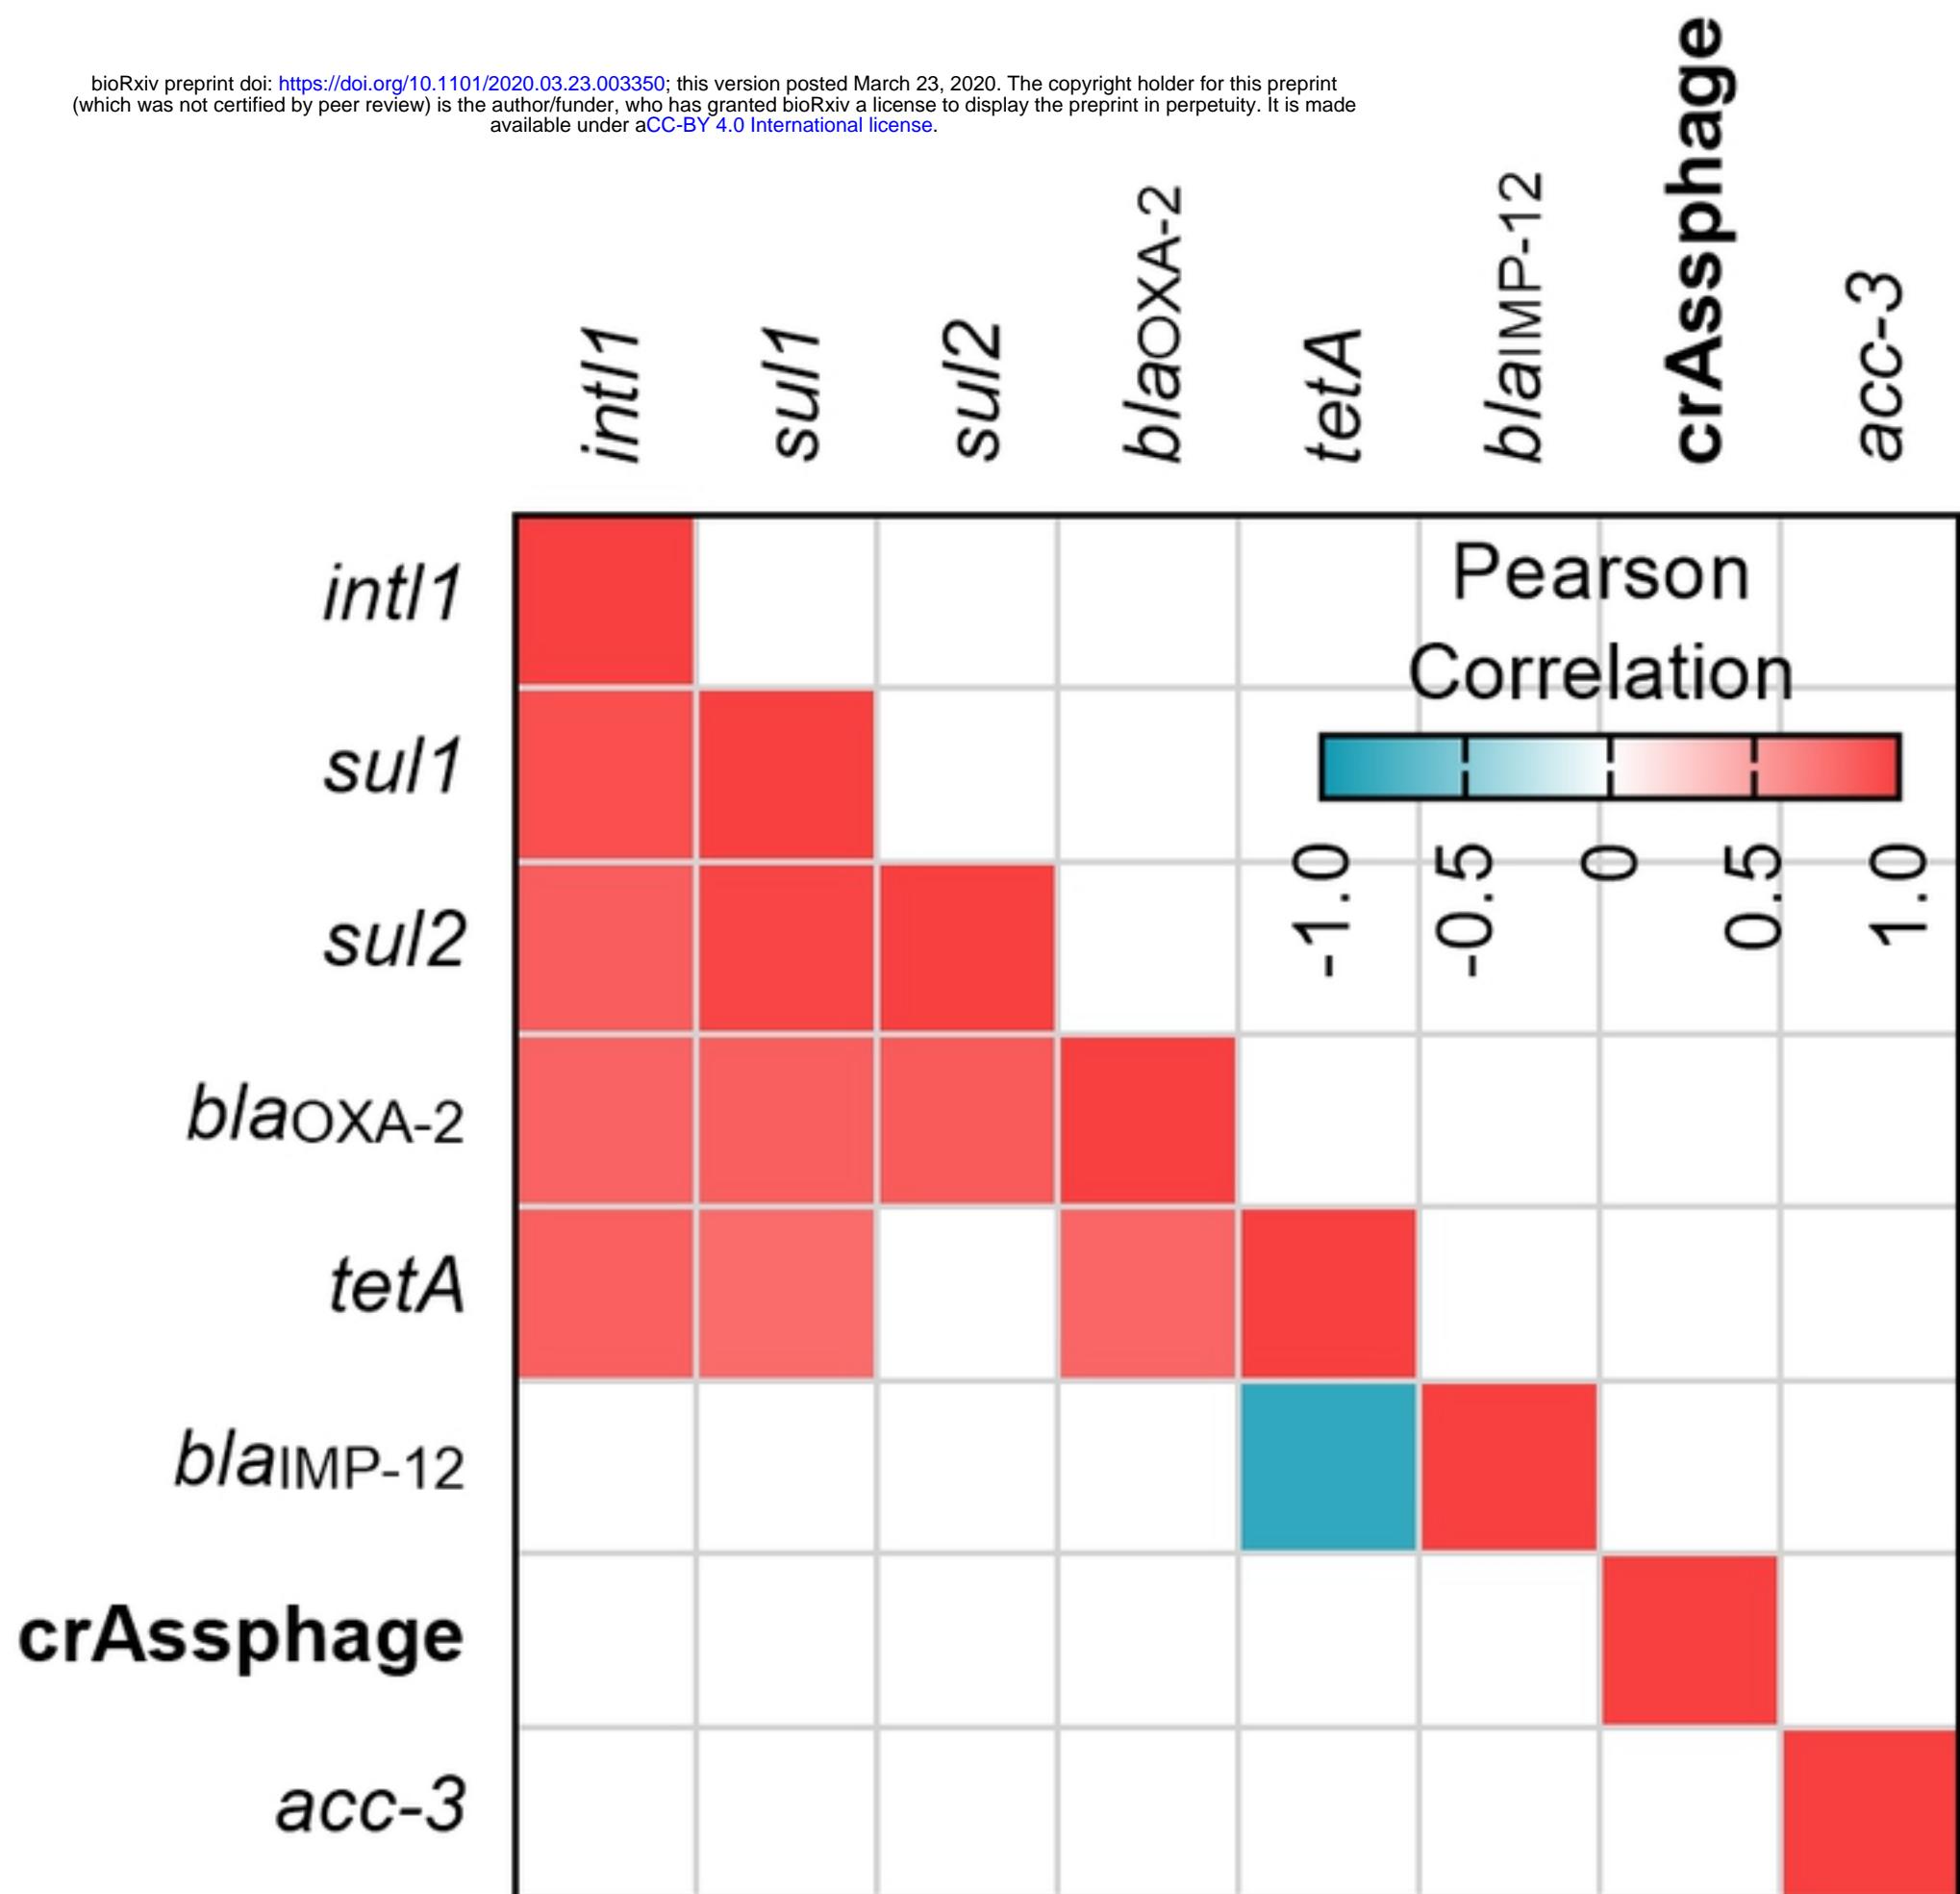

Figure 5

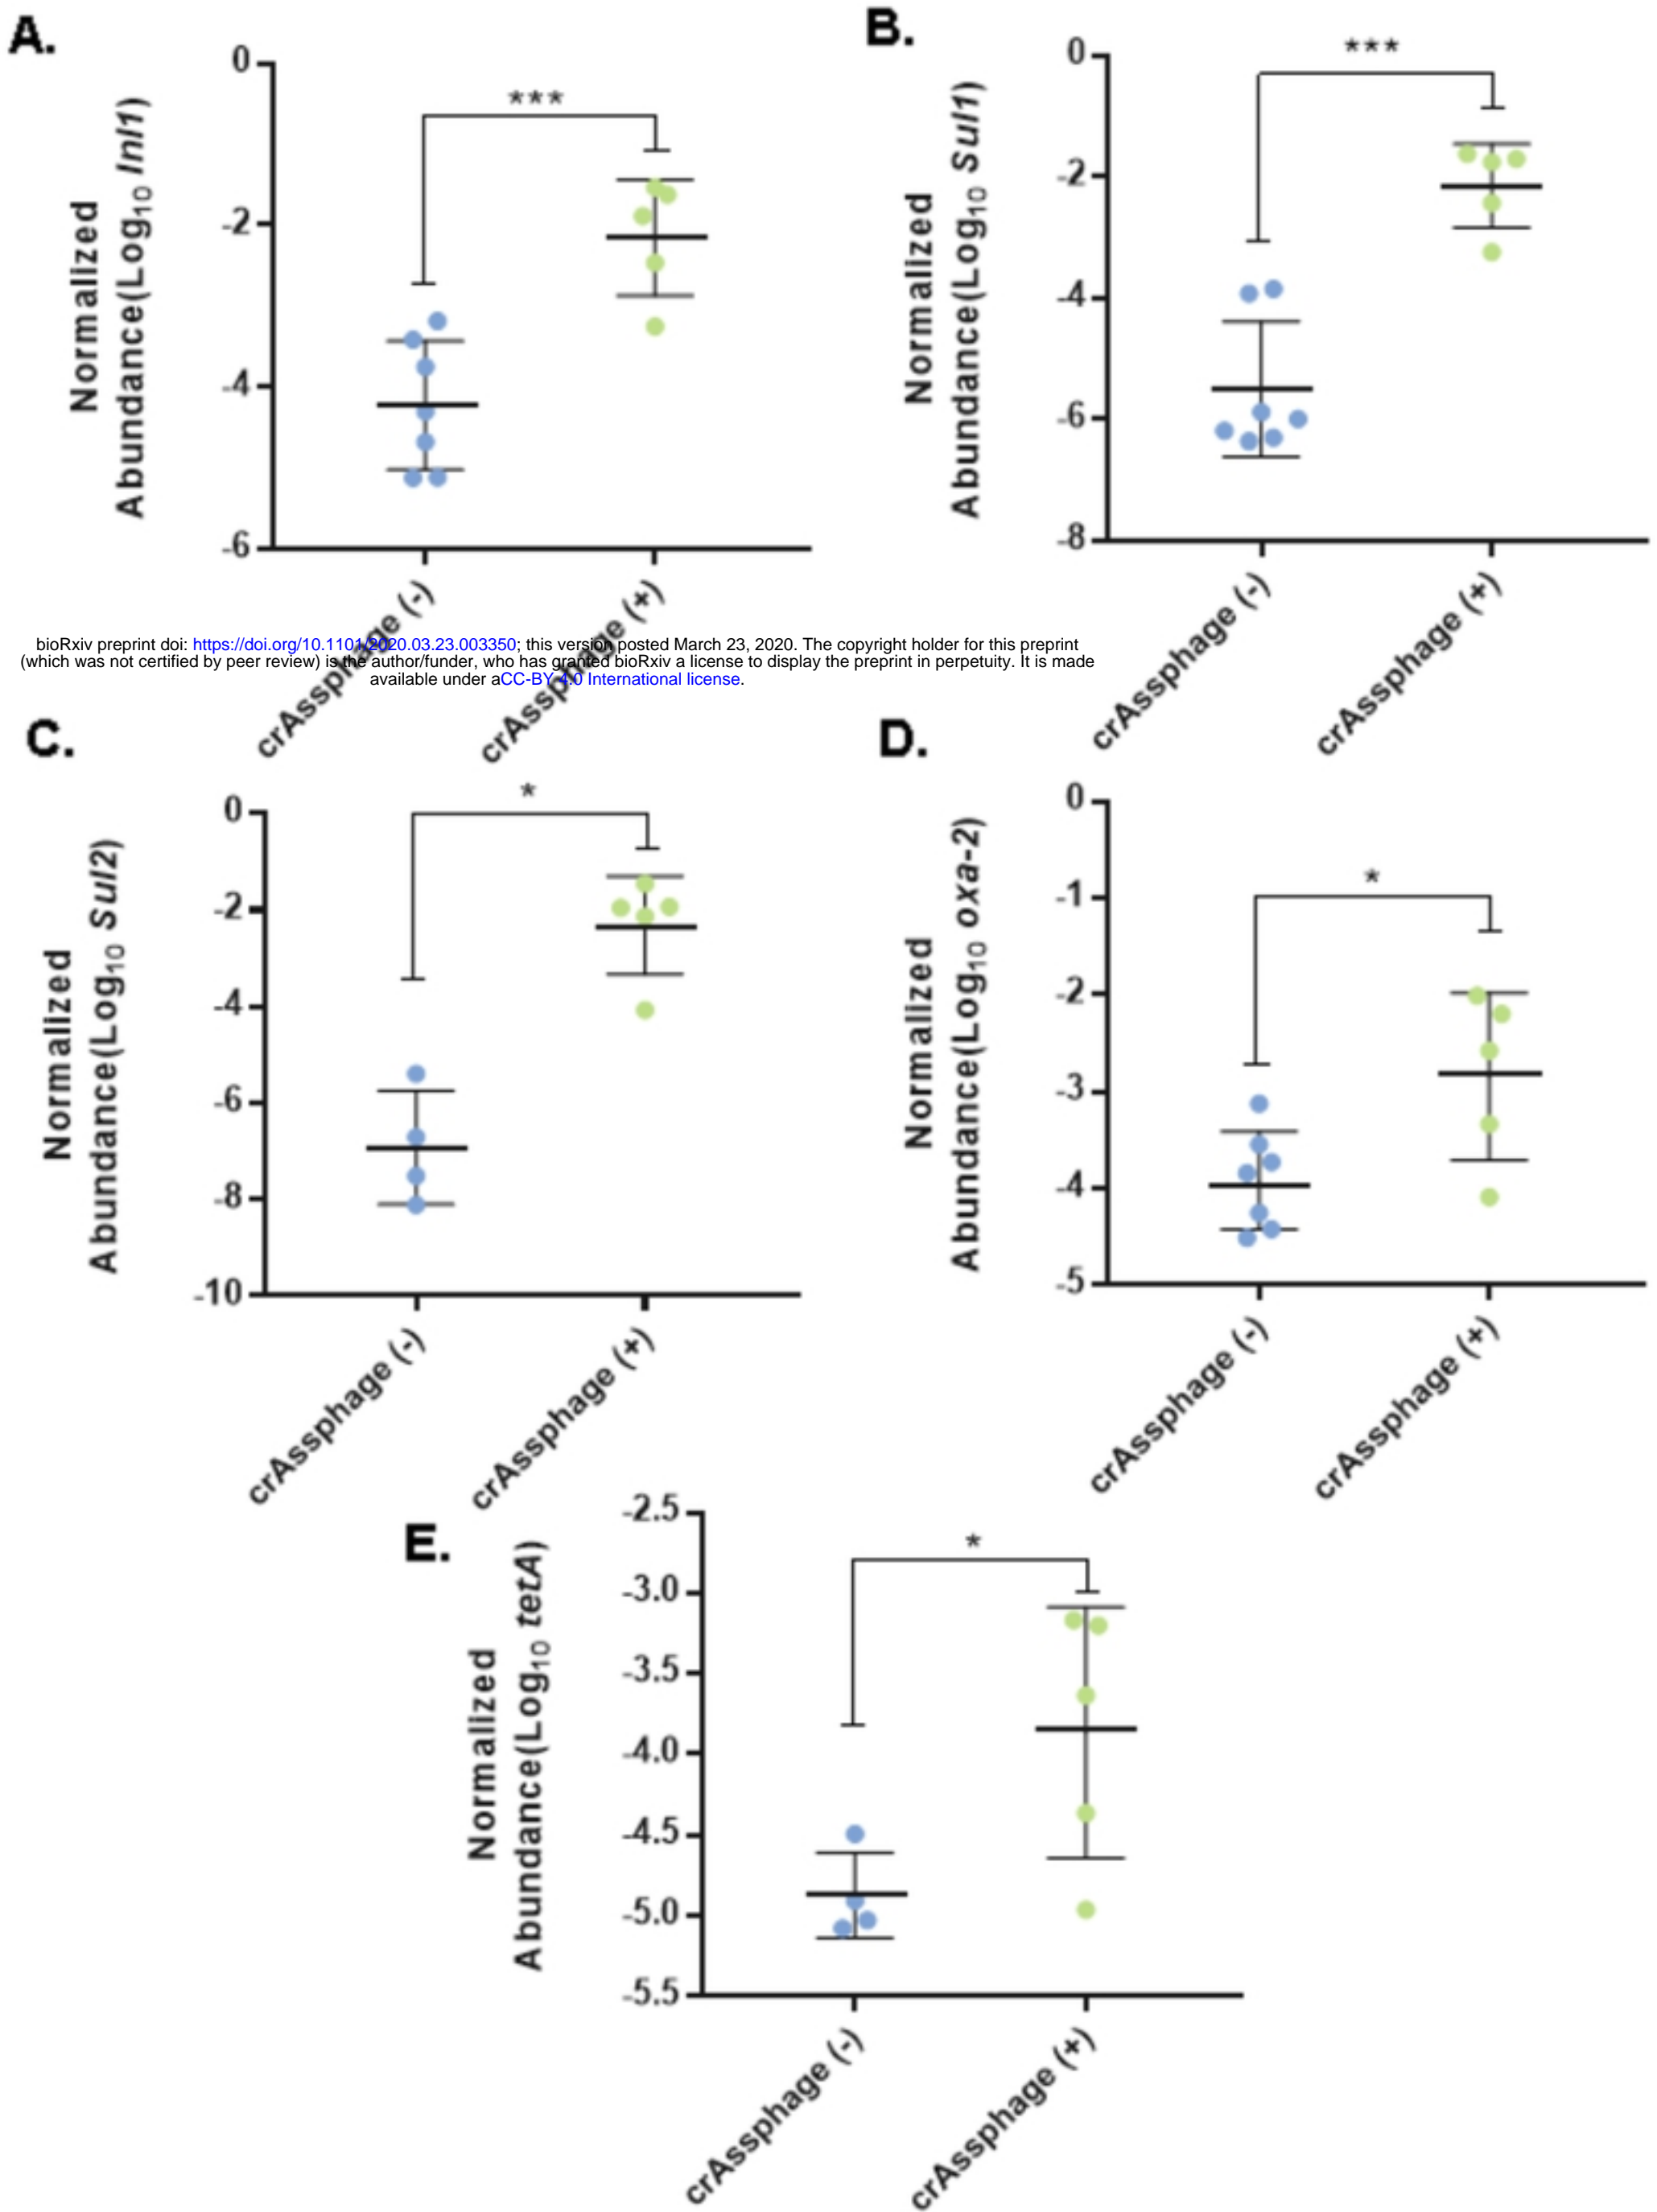

Figure 6

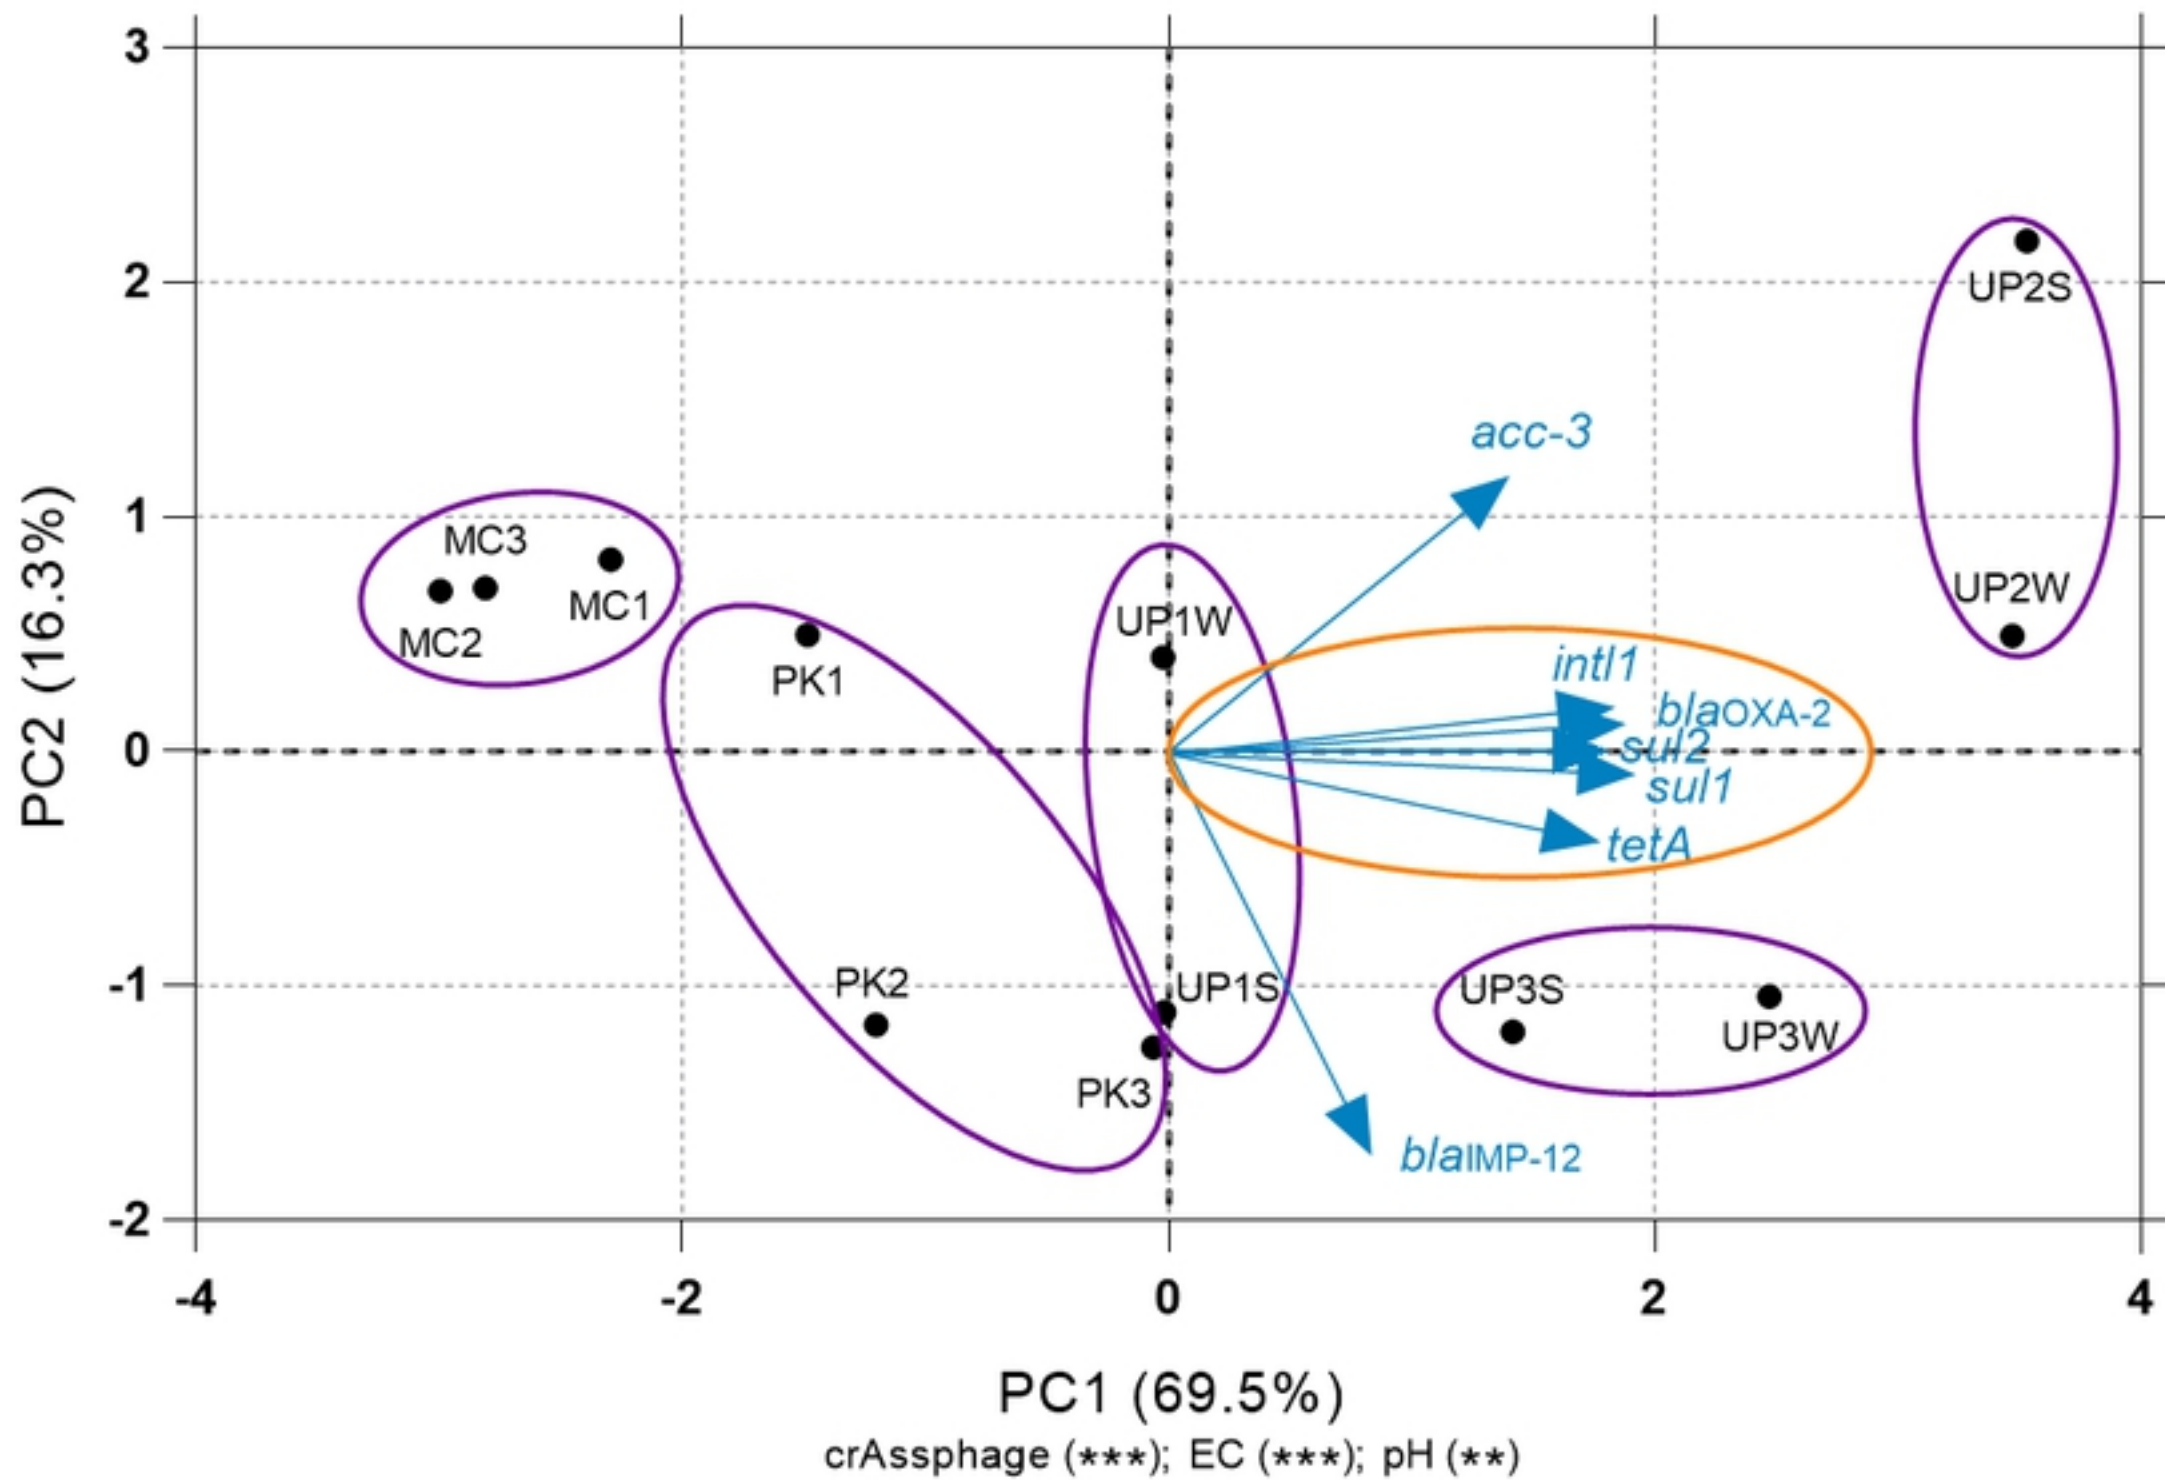

Figure 7
